# Supplementary material for: Extracorporeal Hemadsorption versus Glucocorticoids during Cardiopulmonary Bypass: A Prospective, Randomized, Controlled Trial
Source: Hindawi journal article supplement (doi:10.1155/2020/7834173), 2020-03-30
Supplement: f1 [file 7834173.f1.pdf]

## Supplementary Material

**Table 2.** Levels of cytokines, C5a complement and CD64 and CD163.

| Measure                                  | Group | Before induction<br>of anesthesia | After CPB                      | After surgery (i.e. on admission<br>in ICU) | 24 h after surgery              | 48 h after surgery               | Postoperative day 5             |
|------------------------------------------|-------|-----------------------------------|--------------------------------|---------------------------------------------|---------------------------------|----------------------------------|---------------------------------|
| TNF- $\alpha$ , ng/L<br>(median) [range] | MP    | 10.15 (9.7175) [3.28-58]          | 6.72 (3.8025) [0-29.9]*        | 6.965 (6.1225) [0.419-31]*                  | 6.19 (6.02) [1.14-45.5]         | 5.935 (4.8775) [0-53.2]          | 9.32 (10.645) [0.421-70.1]      |
|                                          | CS    | 7.51 (3.3) [5.27-64.8]            | 14.05 (10.71) [1.31-851]*      | 19.15 (20) [2.78-947]*                      | 7.61 (9.9275) [2.26-41.7]       | 7.6 (8.2225) [2.03-47.8]         | 8.64 (20.8075) [4.06-97.9]      |
|                                          | CO    | 8.31 (3.8025) [3.89-45.2]         | 21.6 (22.75) [4.12-92.8]*      | 23.95 (28.7) [5-586]*                       | 7.77 (4.8375) [0.564-73.6]      | 6.65 (4.6175) [0.481-21.7]       | 8.325 (7.3275) [1.68-44.7]      |
| <b>p value</b>                           |       | 0.223/0.646/0.304                 | <b>0.000/0.000/0.099</b>       | <b>0.000/0.000/0.176</b>                    | 0.160/0.057/0.655               | 0.441/0.465/0.725                | 0.655/0.989/0.695               |
| IL-1 $\beta$ , ng/L<br>(median) [range]  | MP    | 0.295 (0.72375) [0-2.21]          | 0.5315 (0.76625) [0.17-2.32]   | 0.6015 (0.41825) [0.206-8.3]                | 0.3595 (0.6255) [0.11-74.1]     | 0.553 (1.0165) [0.109-3.24]      | 0.4 (0.706) [0.091-3.35]        |
|                                          | CS    | 0.2715 (0.5465) [0-4.04]          | 0.7495 (0.69725) [0.314-3.27]* | 0.9435 (1.1935) [0.45-8.16]*                | 0.722 (1.277) [0.219-6.66]*     | 0.5505 (0.856) [0.048-6.56]      | 0.5365 (0.6615) [0-2.06]        |
|                                          | CO    | 0.2495 (0.303) [0-1.6]            | 0.6485 (0.543) [0.189-2.37]*   | 0.8185 (0.45775) [0.223-2.57]*              | 0.4475 (0.52) [0.225-9.24]*     | 0.555 (0.34975) [0.137-48]       | 0.4875 (0.4175) [0.077-8.41]    |
| <b>p value</b>                           |       | 0.694/0.533/0.616                 | 0.168/0.473/0.534              | <b>0.001/0.047/0.11</b>                     | <b>0.015/0.344/0.117</b>        | 0.903/0.685/0.766                | 0.978/0.607/0.588               |
| IL-6, ng/L<br>(median) [range]           | MP    | 2.59 (4.69) [0-9.17]              | 28.15 (56) [12.2-174]*         | 64.05 (50.2) [17.2-134]*                    | 28.55 (18.975) [9.34-68.1]*     | 25.8 (35.95) [5.6-125]*          | 18.95 (23.125) [8.31-295]*      |
|                                          | CS    | 1.925 (4.49675) [0-7.25]          | 113.5 (169.575) [30.4-1122]*   | 235 (649.5) [45.1-6908]*                    | 174 (141.175) [12.1-281]*       | 96.2 (80.425) [11.7-233]*        | 30.45 (21.525) [10.8-55.8]*     |
|                                          | CO    | 2.305 (4.06875) [0.164-17.7]      | 65.35 (158.775) [18.4-1791]*   | 173.5 (373) [57.7-2359]*                    | 105 (71.45) [39.8-501]*         | 75.6 (63.2) [37.8-254]*          | 21.9 (13.3) [9.95-43.7]*        |
| <b>p value</b>                           |       | 0.704/0.935/0.797                 | <b>0.000/0.055/0.074</b>       | <b>0.000/0.000/0.245</b>                    | <b>0.000/0.000/0.099</b>        | <b>0.000/0.000/0.425</b>         | 0.402/0.935/0.105               |
| IL-8, ng/L<br>(median) [range]           | MP    | 13 (14.255) [3.95-143]            | 24.2 (21.125) [4.66-263]       | 34.05 (27.5) [12.3-82.2]                    | 21.7 (13.45) [5.3-1357]*        | 12.45 (9.3725) [5.38-391]        | 26.35 (32.9) [12.5-104]         |
|                                          | CS    | 12.3 (3.7) [6.33-23.3]            | 79.85 (113.3) [26.1-780]*      | 115.5 (153.15) [36.9-4522]*                 | 31.65 (30.825) [10.5-270]*      | 20.4 (8.275) [14.1-42.8]*        | 35.5 (26.475) [15.3-430]*       |
|                                          | CO    | 11.9 (11.345) [5.38-138]          | 56.6 (65.35) [12.6-390]*       | 139.5 (174.825) [37.2-1214]*                | 33.25 (30.275) [10.8-304]*      | 20.2 (20.175) [6.72-170]         | 28.15 (27.075) [13.4-177]       |
| <b>p value</b>                           |       | 0.675/0.968/0.957                 | <b>0.000/0.002/0.433</b>       | <b>0.000/0.000/0.829</b>                    | <b>0.009/0.016/0.957</b>        | <b>0.002/0.032/0.675</b>         | 0.107/0.441/0.330               |
| IL-10, ng/L<br>(median) [range]          | MP    | 1.13 (1.28225) [0-6.22]           | 252.5 (330) [28.8-749]*        | 121 (175.025) [25-355]*                     | 3.36 (7.865) [0.225-56.5]*      | 2.415 (5.3975) [0.454-37.4]*     | 3.06 (5.5475) [0.34-55.2]*      |
|                                          | CS    | 0.9125 (1.32975) [0-45.1]         | 25.85 (114.65) [9.01-464]*     | 9.175 (16.76) [2.73-1621]*                  | 4.245 (3.555) [1.51-23]*        | 2.815 (2.7925) [0.481-14.5]*     | 1.98 (2.4825) [0.719-10]        |
|                                          | CO    | 2.04 (2.89) [0.4-19.3]            | 21.85 (87.89) [5.74-362]*      | 10.1 (55.705) [4.07-578]*                   | 5.83 (2.705) [0.887-45.8]*      | 3.9 (5.295) [1.14-33.6]          | 3.11 (6.5575) [0.811-17.7]      |
| <b>p value</b>                           |       | 0.473/0.032/0.010                 | <b>0.000/0.000/0.465</b>       | <b>0.000/0.000/0.579</b>                    | 0.839/0.245/0.117               | 0.598/0.208/0.062                | 0.402/0.507/0.094               |
| C5a, mg/L<br>(median) [range]            | MP    | 112.75 (158.95) [23.4-631.2]      | 143.85 (625.425) [24.3-852]    | 112.85 (461.3) [43.9-816]                   | 133.95 (262.025) [43.9-777.2]   | 130.5 (341.925) [60-804]         | 585.75 (474.725) [95.2-836]*    |
|                                          | CS    | 141.75 (155.875) [12.39-864]      | 193.6 (528.55) [32-812]        | 273.45 (575.975) [54.2-818]                 | 280.85 (507.375) [93-775.9]*    | 265.75 (146.575) [105.4-808]     | 404.95 (325.275) [120.4-754.3]* |
|                                          | CO    | 190.85 (590.6) [62.4-848]         | 146.05 (551.325) [25.5-796.4]  | 175.85 (474.475) [36.5-759.2]               | 203.35 (119.775) [67.9-794.3]   | 244.95 (281.05) [88.1-836]       | 362.55 (530.8) [76.2-856]       |
| <b>p value</b>                           |       | 0.425/0.042/0.279                 | 0.935/0.516/0.482              | 0.070/0.646/0.160                           | <b>0.009/0.372/0.012</b>        | 0.019/0.055/0.449                | 0.330/0.665/1.000               |
| CD64mon MFI<br>(median) [range]          | MP    | 8042 (3619.5) [5747-20347]        | 8613(3891) [5250-67784]        | 9504 (4401.25) [6307-18097]+                | 10049 (4197.5) [7350-16139]     | 9464.5 (3171.015) [7544-14411]   | 12529.5 (6468.75) [8172-18955]* |
|                                          | CS    | 10571 (3653) [5873-19633]         | 11498 (5171.5) [5808-20863]    | 13362.5 (5109.5) [7587-23991]*              | 16716.5 (5922.5) [10060-23678]* | 17176 (5649.25) [9224-28441]*    | 14881.5 (3591.5) [10845-21511]* |
|                                          | CO    | 8164 (3943.03) [3203-13962]       | 8476 (2404.5825) [3578-13873]  | 11116 (5508.25) [707-18080]*                | 13803 (6995.25) [4818-19983]*   | 13784.525 (6162.5) [5837-19451]* | 11045 (5129) [5676.38-19269]*   |
| <b>p value</b>                           |       | 0.117/0.570/0.025                 | 0.037/0.646/0.003              | <b>0.001/0.626/0.004</b>                    | <b>0.000/0.010/0.042</b>        | <b>0.000/0.001/0.009</b>         | 0.045/0.626/0.007               |
| CD64gran MFI<br>(median) [range]         | MP    | 1118.43 (363.25) [609-3515]       | 1342.5 (621.5) [793-3332]      | 1356 (526.8625) [835-3168]*                 | 1811.5 (847.4) [926-3084]*      | 2074.5 (1068.705) [1180-4417]*   | 1647.5 (670.75) [951-5640]*     |
|                                          | CS    | 1154.5 (375.75) [851-2624]        | 1591.5 (642.75) [1100-2780]*   | 1676.5 (638.5) [1067-3290]*                 | 1756 (1053.25) [1022-6360]*     | 2190.5 (1024.75) [1366-6021]*    | 1595.5 (480) [1115-3096]*       |
|                                          | CO    | 1073.5 (445.25) [728-1693]        | 1263.045 (506.75) [660-1866]*  | 1322.5 (639.5) [821-2374]*                  | 1590 (792) [991-2858]*          | 1879.5 (677.75) [1041-4958]*     | 1439.89 (489.5) [887.76-3011]*  |
| <b>p value</b>                           |       | 0.745/0.402/0.185                 | 0.035/0.695/0.009              | 0.020/0.914/0.025                           | 0.417/0.665/0.152               | 0.646/0.105/0.040                | 0.465/0.279/0.330               |
| CD64lym MFI<br>(median) [range]          | MP    | 209.5 (84.25) [146-372]           | 232.5 (78.5) [126-416]         | 251.5 (56) [140-352]                        | 265.89 (96.25) [165-477]        | 281 (81.7275) [178-390]*         | 295 (125.5) [190-531]*          |
|                                          | CS    | 252.5 (62.5) [130-351]            | 271 (73.25) [211-496]          | 272.5 (44) [212-381]                        | 288 (106.75) [179-473]*         | 299.5 (92.25) [211-533]*         | 292.5 (86) [191-904]*           |

|                  |    |                              |                            |                                 |                                   |                                  |                              |
|------------------|----|------------------------------|----------------------------|---------------------------------|-----------------------------------|----------------------------------|------------------------------|
|                  | CO | 201.5 (88.75) [143-316]      | 250 (77.75) [135-470]*     | 229 (95.5) [72-424]*            | 267.37 (138.5) [162-625]*         | 301.5 (128.25) [220-824]*        | 276.575 (107.5) [182-395]*   |
| <b>p value</b>   |    | 0.372/0.194/0.047            | 0.021/0.337/0.180          | 0.066/0.957/0.117               | 0.409/0.787/0.665                 | 0.490/0.441/0.745                | 0.685/0.626/0.409            |
| CD163mon MFI     | MP | 4770 (3502.5) [1464-13293]   | 1648 (1162.25) [590-7021]* | 2488.5 (2393.01) [178-7733]*    | 39687.48 (29775.75) [2110-92358]* | 26582.5 (12360.5) [11278-70073]* | 4692 (2398.5) [2032-12657]   |
| (median) [range] | CS | 5091.5 (2616.25) [3186-8042] | 1636 (902) [749-10053]*    | 1650.5 (850.75) [571-3704]*     | 13199 (9429.5) [1099-50170]*      | 10734.5 (4666.25) [3949-29637]*  | 3946 (1145) [2327-6110]*     |
|                  | CO | 4588 (2017.59) [3266-8594]   | 1900 (1449.75) [522-5495]* | 1240.5 (1438.5225) [627-11334]* | 14920 (14151) [5565-52062]*       | 8968.12 (6955) [4861-26643]*     | 4254.78 (2046.5) [2371-6797] |
| <b>p value</b>   |    | 0.465/0.871/0.665            | 0.570/0.499/0.152          | <b>0.010/0.015/0.570</b>        | <b>0.000/0.000/0.935</b>          | <b>0.000/0.000/0.279</b>         | 0.066/0.482/0.279            |
| CD163gran MFI    | MP | 244.5 (63.5) [132-364]       | 240.39 (85.25) [171-353]   | 237.5 (91.25) [165-832]         | 690.5 (568) [426-1621]*           | 956 (737) [408-2928]*            | 304.5 (105.9875) [191-473]*  |
| (median) [range] | CS | 238.5 (78.5) [173-357]       | 280.5 (49) [216-428]       | 269 (43) [208-428]              | 306.5 (90) [184-898]*             | 332 (67.25) [202-1457]*          | 296.5 (85.75) [238-408]*     |
|                  | CO | 197.5 (96.5) [153-391]       | 229.5 (44.1075) [185-625]  | 234 (57) [170-359]              | 263 (100.5) [209-930]*            | 277.4 (92.25) [196-42722]*       | 255.5 (131.5) [175-385]*     |
| <b>p value</b>   |    | 0.957/0.107/0.076            | 0.019/0.818/ <b>0.001</b>  | 0.040/1.000/ <b>0.006</b>       | <b>0.000/0.000/0.117</b>          | <b>0.000/0.000/0.024</b>         | 0.351/0.027/0.086            |
| CD163lym MFI     | MP | 65 (22.5) [44-119]           | 68.565 (19.5) [41-551]     | 67.72 (20.25) [44-100]          | 131 (104.25) [46-376]*            | 118 (79.75) [55-1356]*           | 71.995 (31.5) [48-153]       |
| (median) [range] | CS | 66.5 (15.25) [41-133]        | 59.5 (16.75) [45-108]      | 65.5 (16) [55-82]               | 79 (88.75) [39-289]               | 91 (41.25) [52-168]*             | 70 (20) [41-437]             |
|                  | CO | 60.5 (21.5) [44-113]         | 56 (21.5) [44-134]         | 58 (25.0325) [39-142]           | 133 (117.62) [49-283]*            | 80.5 (107.6575) [54-651]*        | 72 (31.8225) [52-186]        |
| <b>p value</b>   |    | 0.203/0.636/0.133            | 0.386/0.189/0.424          | 0.787/0.176/0.104               | 0.194/0.860/0.330                 | 0.017/0.239/0.695                | 0.285/0.776/0.507            |

Data are shown as (median) and [interquartile range]

MP, Methylprednisolone; CS, Cytosorb; CO, Control; mon, monocytes; gran, granulocytes; lym, lymphocytes; MFI, mean fluorescence intensity from FACS analysis.

p values- are shown for comparisons of groups at different time points: (MP vs. CS)/(MP vs. CO)/(CO vs. CS); p = 0.000 defines p < 0.001; significant p values are indicated in **bold text** (for  $p < 0.016$ ).

\*  $p < 0.01$  for statistical significance in repeated measurements (differences between 'before induction' measurement and other individual measurements).

**Table 3.** Laboratory secondary outcome measures.

| Measure                                          | Group | Before induction<br>of anesthesia | After CPB                  | After surgery (i.e. on admission<br>in ICU) | 24 h after surgery       | 48 h after surgery         | Postoperative day 5       |
|--------------------------------------------------|-------|-----------------------------------|----------------------------|---------------------------------------------|--------------------------|----------------------------|---------------------------|
| C-reactive protein,<br>mg/L, (median)<br>[range] | MP    | 1.61 (2.36) [0.17-6.94]           | 1.09 (1.6) [0.17-5.44]*    | 1.43 (3.2375) [0.36-5.54]                   | 42.85 (39.0) [5.44-124]* | 36.7 (42.6) [5.44-127]*    | 40.6 (43.6) [0.165-161]*  |
|                                                  | CS    | 1.715 (2.9825) [0.33-15.6]        | 1.24 (1.72) [0.2-9.34]*    | 1.76 (1.945) [0.27-12.5]                    | 133.5 (80.5) [0.72-188]* | 204 (85.5) [5.21-291]*     | 98.55 (71.2) [6.02-204]*  |
|                                                  | CO    | 2.555 (3.3025) [0.38-66]          | 1.45 (1.80) [0.173-12.4]*  | 2.03 (2.5125) [0.57-13.2]                   | 109 (45.9) [5.95-165]*   | 163 (58.75) [5.15-233]*    | 99.7 (84.05) [2-190]*     |
| <b>p value</b>                                   |       | 0.482/0.25/0.705                  | 0.735/0.871/0.989          | 0.465/0.579/0.946                           | <b>0.001/0.000/0.152</b> | <b>0.000/0.000/0.058</b>   | <b>0.002/0.002/0.935</b>  |
| Procalcitonin, µg/L<br>(median) [range]          | MP    | 0.035 (0.07) [0.009-0.12]         | 0.09 (0.055) [0.02-0.18]*  | 0.08 (0.065) [0.03-0.33]*                   | 0.19 (0.37) [0.03-1.04]* | 0.165 (0.323) [0.01-0.74]* | 0.14 (0.123) [0.01-0.51]* |
|                                                  | CS    | 0.02 (0.0375) [0.009-0.07]        | 0.095 (0.077) [0.05-0.21]* | 0.115 (0.075) [0.03-0.44]*                  | 0.42 (0.61) [0.11-16.6]* | 0.445 (0.73) [0.09-12.52]* | 0.215 (0.19) [0.09-2.36]* |
|                                                  | CO    | 0.065 (0.0775) [0.009-0.15]       | 0.115 (0.0825) [0.02-0.3]* | 0.115 (0.1025) [0.009-0.69]*                | 0.36 (0.76) [0.01-2.75]* | 0.32 (0.4875) [0.05-1.82]* | 0.22 (0.163) [0.09-0.52]* |
| <b>p value</b>                                   |       | 0.323/0.306/0.026                 | 0.765/0.212/0.464          | 0.085/0.116/0.935                           | <b>0.011/0.007/0.675</b> | <b>0.002/0.017/0.507</b>   | 0.074/0.012/0.665         |
| Leukocytes, G/L<br>(median) [range]              | MP    | 5.65 (3.45) [4.3-9.9]             | 10.1 (7.8) [4.1-19.4]*     | 13.65 (9.625) [6-21.1]*                     | 16.1 (7.7) [9.8-31.4]*   | 13.6 (8.65) [7.8-27.5]*    | 9.15 (2.875) [4.6-15.1]*  |
|                                                  | CS    | 6.8 (2.05) [3.5-8.3]              | 6.85 (2.675) [2.3-12.9]    | 9.1 (3.5) [1.9-16.2]*                       | 10.8 (3.825) [5.1-20.1]* | 11.3 (3.475) [5.8-18.5]*   | 7.35 (1.8) [3.5-12.7]     |
|                                                  | CO    | 6.05 (0.999) [3.4-12.5]           | 7.2 (2.3) [4.6-15.3]       | 8.8 (2.525) [5.8-18.2]*                     | 10.25 (2.08) [5.9-15.2]* | 10.7 (2.5) [6.5-12.8]*     | 7 (2.4) [4.5-11]          |
| <b>p value</b>                                   |       | 0.465/0.807/0.113                 | <b>0.004/0.005/0.645</b>   | <b>0.007/0.010/0.935</b>                    | <b>0.000/0.000/0.735</b> | 0.086/0.015/0.198          | <b>0.014/0.013/0.735</b>  |
| Albumin, g/L<br>(median) [range]                 | MP    | 41 (3.75) [36-46]                 | 25 (5) [20-36]*            | 28.5 (4.5) [21-35]*                         | 30 (3.75) [25-36]*       | 30.5 (3.75) [23-34]*       | 32 (6) [26-40]*           |
|                                                  | CS    | 41 (5.75) [37-46]                 | 22 (5.75) [12-28]*         | 27 (4.5) [18-31]*                           | 28.5 (5) [24-33]*        | 28.5 (4) [24-34]*          | 32.5 (6.75) [27-39]*      |
|                                                  | CO    | 40 (2) [34-46]                    | 25 (3) [19-32]*            | 28 (4.75) [20-37]*                          | 30 (4) [25-35]*          | 30 (3.5) [25-33]*          | 31.5 (3.5) [26-38]*       |
| <b>p value</b>                                   |       | 0.673/0.190/0.445                 | <b>0.005/0.299/0.036</b>   | 0.281/0.683/0.643                           | 0.146/0.946/0.168        | 0.097/0.487/0.186          | 0.892/0.623/0.505         |
| Fibrinogen, g/L<br>(median) [range]              | MP    | 3.53 (0.8825) [2.23-5.01]         | 2.1 (0.47) [1.09-2.86]*    | 2.53 (0.54) [1.41-3.18]*                    | 3.46 (0.5875) [2.2-4.2]  | 3.685 (1.1025) [2.9-5.17]  | 5.235 (1.25) [3.45-8.1]*  |
|                                                  | CS    | 3.475 (0.94) [2.5-5.2]            | 1.95 (0.7375) [1.1-2.98]*  | 2.545 (0.535) [1.5-3.39]*                   | 3.7 (0.715) [2.8-5.55]*  | 5.35 (1.0775) [3.62-6.83]* | 6.535 (2.078) [5.1-9.81]* |
|                                                  | CO    | 3.5 (0.7625) [2.23-4.94]          | 2.1 (0.9125) [1.26-3.4]*   | 2.44 (0.7925) [1.32-3.3]*                   | 3.76 (0.9725) [2.8-5.09] | 5.04 (1.05) [3.65-5.83]*   | 5.91 (0.927) [4.15-9.32]* |
| <b>p value</b>                                   |       | 0.914/0.695/0.957                 | 0.448/0.653/0.223          | 0.645/0.675/0.490                           | 0.030/0.030/0.968        | <b>0.000/0.000/0.417</b>   | <b>0.001/0.009/0.223</b>  |
| Hemoglobin, g/L<br>(median) [range]              | MP    | 137 (13) [105-160]                | 95 (12) [76-138]*          | 113 (17.25) [99-133]*                       | 99 (17) [79-118]*        | 93 (13) [77-110]*          | 100.5 (18.5) [84-120]*    |
|                                                  | CS    | 139.5 (22.25) [109-168]           | 98 (23.5) [81-133]*        | 116 (24) [90-140]*                          | 106 (22.75) [83-137]*    | 101 (15) [84-130]*         | 104.5 (14) [89-123]*      |
|                                                  | CO    | 139.5 (19.25) [109-168]           | 100.5 (19.75) [82-121]*    | 111.5 (20.75) [86-129]*                     | 102.5 (17.25) [83-131]*  | 94 (19.5) [85-126]*        | 107 (16.5) [86-129]*      |
| <b>p value</b>                                   |       | 0.316/0.233/0.946                 | 0.757/0.465/0.807          | 0.407/0.766/0.261                           | 0.092/0.152/0.892        | <b>0.016/0.207/0.213</b>   | 0.129/0.336/0.507         |
| Platelets, g/L<br>(median) [range]               | MP    | 179.5 (75.75) [6-313]             | 119 (46) [72-174]*         | 124 (50) [75-198]*                          | 121 (59) [68-182]*       | 104 (66) [13-155]*         | 163 (83) [69-256]*        |
|                                                  | CS    | 198.5 (92.5) [117-335]            | 86 (24.5) [49-132]*        | 109 (42) [56-189]*                          | 117.5 (49.5) [50-183]*   | 100.5 (47.25) [51-171]*    | 173.5 (85.5) [86-432]     |
|                                                  | CO    | 192.5 (60) [133-232]              | 99.5 (30.5) [54-150]*      | 117.5 (36.75) [53-162]*                     | 101 (52.25) [76-153]*    | 99 (31.75) [63-156]*       | 167.5 (84.25) [101-269]   |
| <b>p value</b>                                   |       | 0.379/0.968/0.372                 | <b>0.003/0.072/0.144</b>   | 0.161/0.152/0.989                           | 0.279/0.273/0.925        | 0.946/0.989/0.860          | 0.191/0.273/0.766         |

MP, Methylprednisolone; CS, Cytosorb; CO, Control

p values- are shown for comparisons of groups at different time points: (MP vs. CS)/(MP vs. CO)/(CO vs. CS); p = 0.000 defines p < 0.001; significant p values are indicated in **bold text** (for  $p < 0.016$ ).

\*  $p < 0.01$  for statistical significance in repeated measurements (differences between 'before induction' measurement and other individual measurements).

**Table 4.** Hemodynamic parameters.

| Measure                                                                                            | Group          | Before induction<br>of anesthesia | After CPB                 | After surgery (i.e. on admission<br>in ICU) | 24 h after surgery         | 48 h after surgery           |
|----------------------------------------------------------------------------------------------------|----------------|-----------------------------------|---------------------------|---------------------------------------------|----------------------------|------------------------------|
| Cardiac index, L.min <sup>-1</sup> .m <sup>-2</sup><br>(median) [range]                            | MP             | 2.4 (0.65) [1.5-4.4]              | 2.45 (0.75) [1.7-3.8]     | 2.7 (0.65) [1.8-4.2]                        | 2.8 (1.3) [2.1-5.8]        | 2.75 (0.925) [1.9-5.3]       |
|                                                                                                    | CS             | 2.8 (1.525) [2-6.5]               | 2.3 (0.825) [1.6-3.7]*    | 2.4 (1.05) [1.7-4.2]*                       | 2.7 (0.55) [1.9-6.7]       | 2.75 (0.925) [2.1-5.8]       |
|                                                                                                    | CO             | 2.9 (0.95) [1.7-5.5]              | 2.25 (0.475) [1.6-3.4]    | 2.4 (1.075) [1.5-4.7]                       | 2.6 (0.775) [1.6-4.3]      | 2.8 (0.95) [2-4.4]           |
|                                                                                                    | <b>p value</b> | 0.231/0.471/0.378                 | 0.154/0.116/0.807         | 0.112/0.158/0.734                           | 0.431/0.212/0.515          | 0.684/0.664/0.480            |
| Systemic vascular resistance<br>index, dyn.s.cm <sup>-5</sup> .m <sup>-2</sup><br>(median) [range] | MP             | 2333 (784.75) [1325-3460]         | 1643.5 (431) [1144-2558]* | 2043.5 (382.75) [1062-3088]                 | 1895.5 (911) [1049-2875]*  | 1860 (871.25) [757-3118]*    |
|                                                                                                    | CS             | 2496 (890.25) [1011-4568]         | 1832.5 (816.5) [868-4220] | 2464 (1570.25) [1370-5093]                  | 2108.5 (753.3) [667-3087]  | 2143.5 (457.5) [650-3407]    |
|                                                                                                    | CO             | 1924 (876) [1257-3235]            | 1855 (824.5) [1093-3078]  | 2216 (1043.5) [1059-4463]                   | 2134 (1383.75) [1380-3913] | 1864.5 (1008.25) [1325-3653] |
|                                                                                                    | <b>p value</b> | 0.682/0.102/0.076                 | 0.242/0.229/1.000         | <b>0.015</b> /0.213/0.317                   | 0.534/0.123/0.402          | 0.358/0.756/0.465            |
| Central venous O <sub>2</sub><br>saturation, % (median)<br>[range]                                 | MP             | 74 (11) [61-98]                   | 82 (14) [53-98]           | 77 (10.25) [58-86]                          | 72 (13.5) [60-85]          | 69 (13) [53-87]              |
|                                                                                                    | CS             | 72.5 (3.75) [57-81]               | 76 (15.25) [47-89]        | 64 (17) [46-94]                             | 66.5 (17.75) [36-90]       | 69 (10) [48-84]              |
|                                                                                                    | CO             | 79 (11) [62-88]                   | 83.5 (6.5) [36-97]        | 72.5 (11.75) [56-94]                        | 69.5 (9.5) [47-98]         | 69 (10.75) [57-90]           |
|                                                                                                    | <b>p value</b> | 0.290/0.242/ <b>0.010</b>         | 0.058/0.811/ <b>0.013</b> | <b>0.005</b> /0.176/0.081                   | 0.239/0.655/0.440          | 0.957/0.903/0.989            |
| Mean arterial pressure,<br>mmHg (median) [range]                                                   | MP             | 98 (20.75) [71-113]               | 70 (12) [51-90]*          | 81 (13.5) [43-101]*                         | 75.5 (12) [61-99]*         | 71 (7.75) [58-96]*           |
|                                                                                                    | CS             | 100.5 (18.25) [74-129]            | 69 (13.25) [55-100]*      | 88 (16) [57-108]*                           | 82 (13.75) [64-110]*       | 81.5 (21.25) [39-98]*        |
|                                                                                                    | CO             | 87 (28.5) [59-140]                | 68.5 (7.25) [50-83]*      | 82.5 (28.5) [61-111]                        | 83.5 (21.25) [61-117]      | 83 (12.5) [66-98]            |
|                                                                                                    | <b>p value</b> | 0.560/0.330/0.126                 | 0.818/0.935/0.797         | 0.081/0.416/0.655                           | 0.250/0.091/0.401          | 0.025/ <b>0.008</b> /0.957   |

MP, Methylprednisolone; CS, Cytosorb; CO, Control

p values- are shown for comparisons of groups at different time points: (MP vs. CS)/(MP vs. CO)/(CO vs. CS); p = 0.000 defines p < 0.001; significant p values are indicated in **bold text** (for  $p < 0.016$ ).

\* for  $p < 0.012$  for statistical significance in repeated measurements (differences between 'before induction' measurement and other individual measurements).

**Table 5.** Consumption of vasoactive/ inotropic drugs and insulin.

| Measure                                    | Group          | Intraoperative            | Postoperative           |                          |                     |
|--------------------------------------------|----------------|---------------------------|-------------------------|--------------------------|---------------------|
|                                            |                |                           | 24 h after surgery      | 48 h after surgery       | Postoperative day 5 |
| Noradrenalin, total mg<br>(median) [range] | MP             | 0.666 (1.3005) [0-6.27]   | 0.575 (2.675) [0-14.08] | 0 (4.155) [0-37.98]      | 0 (0) [0-8.1]       |
|                                            | CS             | 0.2335 (0.4555) [0-2.147] | 0.795 (2.83) [0-8.1]*   | 0 (1.8875) [0-12.2]      | 0 (0) [0-11.5]*     |
|                                            | CO             | 0.277 (0.399) [0-2.64]    | 0.285 (2.8475) [0-9.6]  | 0 (1.615) [0-7.4]        | 0 (0) [0-1.8]*      |
|                                            | <b>p value</b> | 0.024/0.047/0.714         | 0.978/0.880/0.902       | 0.733/0.276/0.455        | 0.384/0.132/0.554   |
| Dobutamine, total mg<br>(median) [range]   | MP             | 0 (10.01) [0-146.08]      | 0 (9) [0-160]           | 0 (0) [0-580]            | 0 (0) [0-0]         |
|                                            | CS             | 1.315 (17.605) [0-78.67]  | 0 (36.625) [0-560]      | 0 (3.875) [0-675]        | 0 (0) [0-0]*        |
|                                            | CO             | 0 (10.915) [0-38.33]      | 0 (80.25) [0-350]*      | 0 (31.5) [0-600]*        | 0 (0) [0-0]*        |
|                                            | <b>p value</b> | 0.417/0.748/0.619         | 0.333/0.234/0.544       | 0.159/0.207/0.901        | 1.000/1.000/1.000   |
| Levosimendan, total mg<br>(median) [range] | MP             | 0 (0) [0-3.83]            | 0 (0) [0-3]             | 0 (0) [0-4]              | 0 (0) [0-0]         |
|                                            | CS             | 0 (0) [0-0]               | 0 (0) [0-0]             | 0 (0) [0-0]              | 0 (0) [0-0]         |
|                                            | CO             | 0 (0) [0-2.9]             | 0 (0) [0-7.65]          | 0 (0) [0-3.4]            | 0 (0) [0-0]         |
|                                            | <b>p value</b> | 0.317/0.594/0.152         | 0.317/0.264/0.076       | 0.317/0.337/0.076        | 1.000/1.000/1.000   |
| Adrenalin, total µg<br>(median) [range]    | MP             | 0 (0) [0-0]               | 0 (0) [0-0]             | 0 (0) [0-0]              | 0 (0) [0-0]         |
|                                            | CS             | 0 (0) [0-25]              | 0 (0) [0-0]             | 0 (0) [0-0]              | 0 (0) [0-0]         |
|                                            | CO             | 0 (0) [0-0]               | 0 (0) [0-0]             | 0 (0) [0-0]              | 0 (0) [0-0]         |
|                                            | <b>p value</b> | 0.317/1.000/0.317         | 1.000/1.000/1.000       | 1.000/1.000/1.000        | 1.000/1.000/1.000   |
| Nitronal, total mg<br>(median) [range]     | MP             | 0 (0) [0-3.23]            | 0 (29.025) [0-149]*     | 0 (94.35) [0-240]*       | 0 (0) [0-0]         |
|                                            | CS             | 0 (0) [0-13.2]            | 0 (28) [0-98]*          | 0 (33) [0-202]*          | 0 (0) [0-15]        |
|                                            | CO             | 0 (0) [0-35.82]           | 0 (27.75) [0-152]       | 0 (78.25) [0-256]        | 0 (0) [0-78]        |
|                                            | <b>p value</b> | 0.554/0.971/0.594         | 0.927/0.901/0.938       | 0.625/0.568/0.924        | 0.317/0.152/0.515   |
| Insulin, total IU<br>(median) [range]      | MP             |                           | 26 (36) [0-88]          | 35 (63.125) [0-206]      | 0 (0) [0-82]*       |
|                                            | CS             |                           | 24 (9) [0-38]           | 14 (18.375) [0-121]*     | 0 (0) [0-22]*       |
|                                            | CO             |                           | 22 (23) [0-56]          | 16 (27.5) [0-56]         | 0 (0) [0-133.5]*    |
|                                            | <b>p value</b> |                           | 0.138/0.069/0.328       | <b>0.000/0.003/0.752</b> | 0.638/0.959/0.742   |

MP, Methylprednisolone; CS, Cytosorb; CO, Control.

p values- are shown for comparisons of groups at different time points: (MP vs. CS)/(MP vs. CO)/(CO vs. CS); p = 0.000 defines p < 0.001; significant p values are indicated in **bold text** (for  $p < 0.016$ ).

\* for  $p < 0.016$  for statistical significance in repeated measurements (differences between 'before induction' measurement and other individual measurements).

**Table 6.** Correlations between inflammatory and biochemical parameters with four procedural times. Spearman's correlation coefficient (p value = 0.0001 after Bonferroni correction for multiple comparisons).

|                |                         | Duration of anesthesia  | CPB duration | Duration of surgery | Cross-clamp duration |        |
|----------------|-------------------------|-------------------------|--------------|---------------------|----------------------|--------|
| Spearman's rho |                         |                         |              |                     |                      |        |
|                |                         |                         |              |                     |                      |        |
|                |                         |                         |              |                     |                      |        |
|                | TNF $\alpha$ 1          | Correlation Coefficient | 0,065        | 0,191               | 0,115                | 0,081  |
|                |                         | Sig. (2-tailed)         | 0,621        | 0,144               | 0,382                | 0,539  |
|                |                         | N                       | 60           | 60                  | 60                   | 60     |
|                | TNF $\alpha$ 2          | Correlation Coefficient | -0,070       | -0,036              | -0,055               | -0,035 |
|                |                         | Sig. (2-tailed)         | 0,595        | 0,786               | 0,678                | 0,789  |
|                |                         | N                       | 60           | 60                  | 60                   | 60     |
|                | TNF $\alpha$ 3          | Correlation Coefficient | -0,174       | -0,179              | -0,147               | -0,126 |
|                |                         | Sig. (2-tailed)         | 0,183        | 0,171               | 0,263                | 0,338  |
|                |                         | N                       | 60           | 60                  | 60                   | 60     |
|                | TNF $\alpha$ 4          | Correlation Coefficient | -0,041       | -0,019              | 0,004                | -0,035 |
|                |                         | Sig. (2-tailed)         | 0,755        | 0,886               | 0,978                | 0,793  |
|                |                         | N                       | 60           | 60                  | 60                   | 60     |
|                | TNF $\alpha$ 5          | Correlation Coefficient | -0,028       | 0,018               | 0,018                | -0,086 |
|                |                         | Sig. (2-tailed)         | 0,830        | 0,891               | 0,891                | 0,512  |
|                |                         | N                       | 60           | 60                  | 60                   | 60     |
|                | TNF $\alpha$ 6          | Correlation Coefficient | 0,131        | 0,005               | 0,136                | -0,020 |
|                |                         | Sig. (2-tailed)         | 0,318        | 0,973               | 0,300                | 0,881  |
|                |                         | N                       | 60           | 60                  | 60                   | 60     |
| IL-1 1.        | Correlation Coefficient | -0,186                  | -0,157       | -0,171              | -0,196               |        |
|                | Sig. (2-tailed)         | 0,155                   | 0,232        | 0,192               | 0,133                |        |
|                | N                       | 60                      | 60           | 60                  | 60                   |        |
| IL-1 2.        | Correlation Coefficient | 0,167                   | 0,217        | 0,203               | 0,147                |        |
|                | Sig. (2-tailed)         | 0,203                   | 0,095        | 0,119               | 0,263                |        |
|                | N                       | 60                      | 60           | 60                  | 60                   |        |

|         |                         |        |        |        |        |
|---------|-------------------------|--------|--------|--------|--------|
| IL-1 3. | Correlation Coefficient | 0,243  | 0,169  | ,270*  | 0,162  |
|         | Sig. (2-tailed)         | 0,062  | 0,198  | 0,037  | 0,215  |
|         | N                       | 60     | 60     | 60     | 60     |
| IL-1 4. | Correlation Coefficient | -0,019 | 0,018  | 0,055  | 0,062  |
|         | Sig. (2-tailed)         | 0,884  | 0,891  | 0,678  | 0,637  |
|         | N                       | 60     | 60     | 60     | 60     |
| IL-1 5. | Correlation Coefficient | 0,098  | 0,214  | 0,120  | 0,179  |
|         | Sig. (2-tailed)         | 0,455  | 0,100  | 0,361  | 0,172  |
|         | N                       | 60     | 60     | 60     | 60     |
| IL-1 6. | Correlation Coefficient | -0,098 | -0,074 | -0,082 | -0,181 |
|         | Sig. (2-tailed)         | 0,454  | 0,574  | 0,535  | 0,166  |
|         | N                       | 60     | 60     | 60     | 60     |
| IL-6 1. | Correlation Coefficient | 0,117  | 0,197  | 0,122  | ,309*  |
|         | Sig. (2-tailed)         | 0,371  | 0,132  | 0,352  | 0,016  |
|         | N                       | 60     | 60     | 60     | 60     |
| IL-6 2. | Correlation Coefficient | ,430** | ,407** | ,447** | ,378** |
|         | Sig. (2-tailed)         | 0,001  | 0,001  | 0,000  | 0,003  |
|         | N                       | 60     | 60     | 60     | 60     |
| IL-6 3. | Correlation Coefficient | 0,135  | 0,076  | 0,137  | 0,173  |
|         | Sig. (2-tailed)         | 0,305  | 0,563  | 0,297  | 0,187  |
|         | N                       | 60     | 60     | 60     | 60     |
| IL-6 4. | Correlation Coefficient | -0,055 | -0,106 | -0,019 | 0,015  |
|         | Sig. (2-tailed)         | 0,679  | 0,422  | 0,885  | 0,907  |
|         | N                       | 60     | 60     | 60     | 60     |
| IL-6 5. | Correlation Coefficient | -0,042 | -0,071 | 0,015  | -0,029 |
|         | Sig. (2-tailed)         | 0,751  | 0,592  | 0,910  | 0,824  |
|         | N                       | 60     | 60     | 60     | 60     |
| IL-6 6. | Correlation Coefficient | 0,034  | 0,083  | 0,113  | 0,023  |
|         | Sig. (2-tailed)         | 0,798  | 0,530  | 0,390  | 0,863  |
|         | N                       | 60     | 60     | 60     | 60     |
| IL-8 1. | Correlation Coefficient | -0,037 | 0,052  | -0,024 | 0,037  |
|         | Sig. (2-tailed)         | 0,777  | 0,692  | 0,856  | 0,777  |
|         | N                       | 60     | 60     | 60     | 60     |

|          |                         |                   |        |                   |        |
|----------|-------------------------|-------------------|--------|-------------------|--------|
| IL-8 2.  | Correlation Coefficient | ,262 <sup>*</sup> | 0,178  | ,272 <sup>*</sup> | 0,128  |
|          | Sig. (2-tailed)         | 0,043             | 0,173  | 0,036             | 0,329  |
|          | N                       | 60                | 60     | 60                | 60     |
| IL-8 3.  | Correlation Coefficient | 0,146             | 0,084  | 0,149             | 0,115  |
|          | Sig. (2-tailed)         | 0,266             | 0,524  | 0,255             | 0,383  |
|          | N                       | 60                | 60     | 60                | 60     |
| IL-8 4.  | Correlation Coefficient | 0,058             | 0,145  | 0,121             | 0,170  |
|          | Sig. (2-tailed)         | 0,662             | 0,269  | 0,357             | 0,195  |
|          | N                       | 60                | 60     | 60                | 60     |
| IL-8 5.  | Correlation Coefficient | 0,044             | 0,074  | 0,054             | 0,125  |
|          | Sig. (2-tailed)         | 0,736             | 0,572  | 0,682             | 0,341  |
|          | N                       | 60                | 60     | 60                | 60     |
| IL-8 6.  | Correlation Coefficient | 0,143             | -0,035 | 0,140             | 0,002  |
|          | Sig. (2-tailed)         | 0,275             | 0,791  | 0,285             | 0,989  |
|          | N                       | 60                | 60     | 60                | 60     |
| IL-10 1. | Correlation Coefficient | -0,050            | -0,015 | -0,076            | -0,001 |
|          | Sig. (2-tailed)         | 0,704             | 0,911  | 0,565             | 0,992  |
|          | N                       | 60                | 60     | 60                | 60     |
| IL-10 2. | Correlation Coefficient | -0,072            | -0,027 | -0,093            | -0,064 |
|          | Sig. (2-tailed)         | 0,582             | 0,839  | 0,481             | 0,626  |
|          | N                       | 60                | 60     | 60                | 60     |
| IL-10 3. | Correlation Coefficient | -0,103            | 0,023  | -0,109            | 0,008  |
|          | Sig. (2-tailed)         | 0,433             | 0,864  | 0,409             | 0,950  |
|          | N                       | 60                | 60     | 60                | 60     |
| IL-10 4. | Correlation Coefficient | 0,032             | 0,019  | 0,069             | 0,010  |
|          | Sig. (2-tailed)         | 0,809             | 0,883  | 0,602             | 0,939  |
|          | N                       | 60                | 60     | 60                | 60     |
| IL-10 5. | Correlation Coefficient | 0,076             | 0,141  | 0,071             | 0,102  |
|          | Sig. (2-tailed)         | 0,564             | 0,284  | 0,588             | 0,440  |
|          | N                       | 60                | 60     | 60                | 60     |
| IL-10 6. | Correlation Coefficient | 0,113             | 0,104  | 0,110             | -0,001 |
|          | Sig. (2-tailed)         | 0,392             | 0,428  | 0,405             | 0,993  |
|          | N                       | 60                | 60     | 60                | 60     |



|           |                         |                    |                    |                     |                    |
|-----------|-------------------------|--------------------|--------------------|---------------------|--------------------|
| C5a 1.    | Correlation Coefficient | -,295 <sup>*</sup> | -,276 <sup>*</sup> | -,332 <sup>**</sup> | -,303 <sup>*</sup> |
|           | Sig. (2-tailed)         | 0,022              | 0,033              | 0,010               | 0,018              |
|           | N                       | 60                 | 60                 | 60                  | 60                 |
| C5a 2.    | Correlation Coefficient | -0,179             | -0,130             | -0,183              | -0,121             |
|           | Sig. (2-tailed)         | 0,171              | 0,323              | 0,162               | 0,357              |
|           | N                       | 60                 | 60                 | 60                  | 60                 |
| C5a 3.    | Correlation Coefficient | 0,107              | 0,141              | 0,147               | 0,074              |
|           | Sig. (2-tailed)         | 0,417              | 0,283              | 0,261               | 0,576              |
|           | N                       | 60                 | 60                 | 60                  | 60                 |
| C5a 4.    | Correlation Coefficient | -0,097             | -0,148             | -0,131              | -0,054             |
|           | Sig. (2-tailed)         | 0,462              | 0,258              | 0,317               | 0,680              |
|           | N                       | 60                 | 60                 | 60                  | 60                 |
| C5a 5.    | Correlation Coefficient | -0,202             | -0,169             | -0,214              | -0,150             |
|           | Sig. (2-tailed)         | 0,121              | 0,196              | 0,100               | 0,253              |
|           | N                       | 60                 | 60                 | 60                  | 60                 |
| C5a 6.    | Correlation Coefficient | -0,114             | -0,157             | -0,115              | -0,248             |
|           | Sig. (2-tailed)         | 0,386              | 0,232              | 0,383               | 0,056              |
|           | N                       | 60                 | 60                 | 60                  | 60                 |
| CD64 lim1 | Correlation Coefficient | -0,063             | -0,126             | -0,105              | -0,050             |
|           | Sig. (2-tailed)         | 0,635              | 0,336              | 0,426               | 0,704              |
|           | N                       | 60                 | 60                 | 60                  | 60                 |
| CD64 lim2 | Correlation Coefficient | 0,016              | -0,106             | -0,034              | 0,003              |
|           | Sig. (2-tailed)         | 0,903              | 0,419              | 0,796               | 0,982              |
|           | N                       | 60                 | 60                 | 60                  | 60                 |
| CD64 lim3 | Correlation Coefficient | -0,036             | -0,202             | -0,080              | -0,087             |
|           | Sig. (2-tailed)         | 0,785              | 0,122              | 0,545               | 0,509              |
|           | N                       | 60                 | 60                 | 60                  | 60                 |
| CD64 lim4 | Correlation Coefficient | -0,124             | -0,172             | -0,157              | -0,106             |
|           | Sig. (2-tailed)         | 0,345              | 0,189              | 0,230               | 0,418              |
|           | N                       | 60                 | 60                 | 60                  | 60                 |
| CD64 lim5 | Correlation Coefficient | 0,240              | 0,083              | 0,240               | 0,144              |
|           | Sig. (2-tailed)         | 0,064              | 0,527              | 0,065               | 0,274              |
|           | N                       | 60                 | 60                 | 60                  | 60                 |

|           |                         |        |        |        |        |
|-----------|-------------------------|--------|--------|--------|--------|
| CD64 lim6 | Correlation Coefficient | -0,056 | -0,161 | -0,149 | -0,133 |
|           | Sig. (2-tailed)         | 0,673  | 0,220  | 0,255  | 0,310  |
|           | N                       | 60     | 60     | 60     | 60     |
| CD64mo1   | Correlation Coefficient | 0,026  | -0,118 | -0,021 | -0,064 |
|           | Sig. (2-tailed)         | 0,841  | 0,368  | 0,874  | 0,629  |
|           | N                       | 60     | 60     | 60     | 60     |
| CD64mo2   | Correlation Coefficient | 0,040  | -0,018 | 0,037  | 0,029  |
|           | Sig. (2-tailed)         | 0,761  | 0,893  | 0,777  | 0,824  |
|           | N                       | 60     | 60     | 60     | 60     |
| CD64mo3   | Correlation Coefficient | 0,154  | 0,084  | 0,148  | 0,086  |
|           | Sig. (2-tailed)         | 0,239  | 0,526  | 0,258  | 0,516  |
|           | N                       | 60     | 60     | 60     | 60     |
| CD64mo4   | Correlation Coefficient | -0,117 | -0,119 | -0,110 | -0,015 |
|           | Sig. (2-tailed)         | 0,373  | 0,367  | 0,404  | 0,910  |
|           | N                       | 60     | 60     | 60     | 60     |
| CD64mo5   | Correlation Coefficient | -0,130 | -0,168 | -0,103 | -0,083 |
|           | Sig. (2-tailed)         | 0,323  | 0,201  | 0,434  | 0,530  |
|           | N                       | 60     | 60     | 60     | 60     |
| CD64mo6   | Correlation Coefficient | -0,083 | -0,044 | -0,068 | -0,105 |
|           | Sig. (2-tailed)         | 0,530  | 0,739  | 0,604  | 0,426  |
|           | N                       | 60     | 60     | 60     | 60     |
| CD64gra1  | Correlation Coefficient | -0,018 | -0,125 | -0,057 | -0,140 |
|           | Sig. (2-tailed)         | 0,893  | 0,340  | 0,667  | 0,286  |
|           | N                       | 60     | 60     | 60     | 60     |
| CD64gra2  | Correlation Coefficient | 0,147  | 0,021  | 0,097  | -0,024 |
|           | Sig. (2-tailed)         | 0,262  | 0,871  | 0,461  | 0,853  |
|           | N                       | 60     | 60     | 60     | 60     |
| CD64gra3  | Correlation Coefficient | 0,144  | 0,073  | 0,125  | 0,072  |
|           | Sig. (2-tailed)         | 0,273  | 0,580  | 0,342  | 0,587  |
|           | N                       | 60     | 60     | 60     | 60     |
| CD64gra4  | Correlation Coefficient | 0,028  | 0,025  | -0,010 | -0,014 |
|           | Sig. (2-tailed)         | 0,831  | 0,849  | 0,937  | 0,914  |
|           | N                       | 60     | 60     | 60     | 60     |

|           |                         |        |        |        |        |
|-----------|-------------------------|--------|--------|--------|--------|
| CD64gra5  | Correlation Coefficient | 0,191  | 0,133  | 0,149  | 0,030  |
|           | Sig. (2-tailed)         | 0,144  | 0,309  | 0,255  | 0,822  |
|           | N                       | 60     | 60     | 60     | 60     |
| CD64gra6  | Correlation Coefficient | 0,008  | 0,047  | -0,043 | 0,001  |
|           | Sig. (2-tailed)         | 0,951  | 0,719  | 0,743  | 0,996  |
|           | N                       | 60     | 60     | 60     | 60     |
| CD163lim1 | Correlation Coefficient | 0,060  | -0,022 | 0,013  | -0,044 |
|           | Sig. (2-tailed)         | 0,649  | 0,865  | 0,920  | 0,736  |
|           | N                       | 60     | 60     | 60     | 60     |
| CD163lim2 | Correlation Coefficient | 0,004  | -0,058 | -0,040 | -0,069 |
|           | Sig. (2-tailed)         | 0,978  | 0,662  | 0,763  | 0,601  |
|           | N                       | 60     | 60     | 60     | 60     |
| CD163lim3 | Correlation Coefficient | -0,065 | -0,116 | -0,097 | -0,052 |
|           | Sig. (2-tailed)         | 0,621  | 0,378  | 0,461  | 0,693  |
|           | N                       | 60     | 60     | 60     | 60     |
| CD163lim4 | Correlation Coefficient | -0,040 | -0,119 | -0,064 | -0,157 |
|           | Sig. (2-tailed)         | 0,761  | 0,365  | 0,628  | 0,232  |
|           | N                       | 60     | 60     | 60     | 60     |
| CD163lim5 | Correlation Coefficient | 0,197  | 0,125  | 0,219  | 0,160  |
|           | Sig. (2-tailed)         | 0,132  | 0,343  | 0,093  | 0,223  |
|           | N                       | 60     | 60     | 60     | 60     |
| CD163lim6 | Correlation Coefficient | 0,082  | -0,033 | -0,004 | -0,108 |
|           | Sig. (2-tailed)         | 0,535  | 0,800  | 0,975  | 0,412  |
|           | N                       | 60     | 60     | 60     | 60     |
| CD163mo1  | Correlation Coefficient | -0,037 | -0,167 | -0,089 | -0,225 |
|           | Sig. (2-tailed)         | 0,778  | 0,202  | 0,498  | 0,084  |
|           | N                       | 60     | 60     | 60     | 60     |
| CD163mo2  | Correlation Coefficient | -0,170 | -0,126 | -0,189 | -0,051 |
|           | Sig. (2-tailed)         | 0,194  | 0,337  | 0,148  | 0,700  |
|           | N                       | 60     | 60     | 60     | 60     |
| CD163mo3  | Correlation Coefficient | 0,213  | ,294*  | 0,208  | 0,178  |
|           | Sig. (2-tailed)         | 0,102  | 0,023  | 0,111  | 0,173  |
|           | N                       | 60     | 60     | 60     | 60     |

|           |                         |        |        |        |        |
|-----------|-------------------------|--------|--------|--------|--------|
| CD163mo4  | Correlation Coefficient | 0,167  | 0,228  | 0,147  | 0,104  |
|           | Sig. (2-tailed)         | 0,201  | 0,079  | 0,261  | 0,429  |
|           | N                       | 60     | 60     | 60     | 60     |
| CD163mo5  | Correlation Coefficient | 0,199  | ,276*  | 0,172  | 0,194  |
|           | Sig. (2-tailed)         | 0,127  | 0,033  | 0,189  | 0,137  |
|           | N                       | 60     | 60     | 60     | 60     |
| CD163mo6  | Correlation Coefficient | -0,067 | 0,037  | -0,106 | 0,001  |
|           | Sig. (2-tailed)         | 0,612  | 0,778  | 0,422  | 0,993  |
|           | N                       | 60     | 60     | 60     | 60     |
| CD163gra1 | Correlation Coefficient | -0,173 | -0,107 | -0,178 | -0,127 |
|           | Sig. (2-tailed)         | 0,185  | 0,414  | 0,173  | 0,335  |
|           | N                       | 60     | 60     | 60     | 60     |
| CD163gra2 | Correlation Coefficient | -0,156 | -0,110 | -0,181 | -0,141 |
|           | Sig. (2-tailed)         | 0,234  | 0,401  | 0,167  | 0,283  |
|           | N                       | 60     | 60     | 60     | 60     |
| CD163gra3 | Correlation Coefficient | -,271* | -0,209 | -,291* | -0,185 |
|           | Sig. (2-tailed)         | 0,036  | 0,108  | 0,024  | 0,157  |
|           | N                       | 60     | 60     | 60     | 60     |
| CD163gra4 | Correlation Coefficient | 0,058  | 0,096  | 0,033  | 0,017  |
|           | Sig. (2-tailed)         | 0,662  | 0,464  | 0,802  | 0,899  |
|           | N                       | 60     | 60     | 60     | 60     |
| CD163gra5 | Correlation Coefficient | 0,187  | 0,197  | 0,166  | 0,103  |
|           | Sig. (2-tailed)         | 0,153  | 0,131  | 0,206  | 0,434  |
|           | N                       | 60     | 60     | 60     | 60     |
| CD163gra6 | Correlation Coefficient | 0,101  | 0,026  | 0,003  | 0,014  |
|           | Sig. (2-tailed)         | 0,444  | 0,846  | 0,981  | 0,916  |
|           | N                       | 60     | 60     | 60     | 60     |
| hs-CRP 1. | Correlation Coefficient | 0,186  | 0,122  | 0,143  | 0,250  |
|           | Sig. (2-tailed)         | 0,154  | 0,353  | 0,277  | 0,054  |
|           | N                       | 60     | 60     | 60     | 60     |
| hs-CRP 2. | Correlation Coefficient | 0,164  | 0,194  | 0,121  | ,297*  |
|           | Sig. (2-tailed)         | 0,210  | 0,137  | 0,358  | 0,021  |
|           | N                       | 60     | 60     | 60     | 60     |

|           |                         |                    |                   |                    |                   |
|-----------|-------------------------|--------------------|-------------------|--------------------|-------------------|
| hs-CRP 3. | Correlation Coefficient | ,302 <sup>†</sup>  | 0,234             | 0,250              | ,316 <sup>†</sup> |
|           | Sig. (2-tailed)         | 0,019              | 0,071             | 0,054              | 0,014             |
|           | N                       | 60                 | 60                | 60                 | 60                |
| hs-CRP 4. | Correlation Coefficient | 0,022              | 0,088             | 0,072              | 0,194             |
|           | Sig. (2-tailed)         | 0,865              | 0,501             | 0,585              | 0,137             |
|           | N                       | 60                 | 60                | 60                 | 60                |
| hs-CRP 5. | Correlation Coefficient | -0,004             | -0,070            | 0,060              | -0,006            |
|           | Sig. (2-tailed)         | 0,977              | 0,595             | 0,648              | 0,963             |
|           | N                       | 60                 | 60                | 60                 | 60                |
| hs-CRP 6. | Correlation Coefficient | 0,071              | 0,127             | 0,152              | 0,154             |
|           | Sig. (2-tailed)         | 0,592              | 0,335             | 0,246              | 0,239             |
|           | N                       | 60                 | 60                | 60                 | 60                |
| PCT 1.    | Correlation Coefficient | 0,113              | 0,000             | 0,071              | 0,031             |
|           | Sig. (2-tailed)         | 0,388              | 0,997             | 0,588              | 0,816             |
|           | N                       | 60                 | 60                | 60                 | 60                |
| PCT 2.    | Correlation Coefficient | 0,225              | 0,175             | 0,215              | 0,195             |
|           | Sig. (2-tailed)         | 0,084              | 0,182             | 0,099              | 0,136             |
|           | N                       | 60                 | 60                | 60                 | 60                |
| PCT 3.    | Correlation Coefficient | ,381 <sup>**</sup> | ,301 <sup>†</sup> | ,373 <sup>**</sup> | 0,246             |
|           | Sig. (2-tailed)         | 0,003              | 0,020             | 0,003              | 0,058             |
|           | N                       | 60                 | 60                | 60                 | 60                |
| PCT 4.    | Correlation Coefficient | 0,092              | 0,094             | 0,119              | 0,135             |
|           | Sig. (2-tailed)         | 0,486              | 0,477             | 0,364              | 0,305             |
|           | N                       | 60                 | 60                | 60                 | 60                |
| PCT 5.    | Correlation Coefficient | 0,177              | 0,136             | 0,199              | 0,199             |
|           | Sig. (2-tailed)         | 0,176              | 0,301             | 0,128              | 0,127             |
|           | N                       | 60                 | 60                | 60                 | 60                |
| PCT 6.    | Correlation Coefficient | 0,217              | 0,213             | 0,222              | 0,178             |
|           | Sig. (2-tailed)         | 0,096              | 0,103             | 0,088              | 0,173             |
|           | N                       | 60                 | 60                | 60                 | 60                |
| Le 1.     | Correlation Coefficient | -0,011             | -0,008            | -0,037             | 0,129             |
|           | Sig. (2-tailed)         | 0,933              | 0,950             | 0,782              | 0,326             |
|           | N                       | 60                 | 60                | 60                 | 60                |

|            |                         |        |        |         |         |
|------------|-------------------------|--------|--------|---------|---------|
| Le 2.      | Correlation Coefficient | 0,135  | 0,071  | 0,109   | 0,125   |
|            | Sig. (2-tailed)         | 0,307  | 0,595  | 0,410   | 0,345   |
|            | N                       | 59     | 59     | 59      | 59      |
| Le 3.      | Correlation Coefficient | 0,071  | 0,126  | 0,075   | 0,215   |
|            | Sig. (2-tailed)         | 0,592  | 0,336  | 0,570   | 0,099   |
|            | N                       | 60     | 60     | 60      | 60      |
| Le 4.      | Correlation Coefficient | 0,030  | ,283*  | 0,077   | ,287*   |
|            | Sig. (2-tailed)         | 0,823  | 0,030  | 0,563   | 0,028   |
|            | N                       | 59     | 59     | 59      | 59      |
| Le 5.      | Correlation Coefficient | -0,052 | 0,063  | -0,021  | 0,125   |
|            | Sig. (2-tailed)         | 0,692  | 0,634  | 0,876   | 0,343   |
|            | N                       | 60     | 60     | 60      | 60      |
| Le 6.      | Correlation Coefficient | -0,122 | -0,032 | -0,143  | 0,014   |
|            | Sig. (2-tailed)         | 0,354  | 0,809  | 0,276   | 0,916   |
|            | N                       | 60     | 60     | 60      | 60      |
| Albumin 1. | Correlation Coefficient | -0,154 | -0,137 | -0,126  | -0,156  |
|            | Sig. (2-tailed)         | 0,241  | 0,296  | 0,339   | 0,233   |
|            | N                       | 60     | 60     | 60      | 60      |
| Albumin 2. | Correlation Coefficient | -0,042 | 0,125  | -0,047  | -0,014  |
|            | Sig. (2-tailed)         | 0,748  | 0,339  | 0,724   | 0,915   |
|            | N                       | 60     | 60     | 60      | 60      |
| Albumin 3. | Correlation Coefficient | 0,102  | 0,147  | 0,060   | 0,017   |
|            | Sig. (2-tailed)         | 0,437  | 0,261  | 0,647   | 0,900   |
|            | N                       | 60     | 60     | 60      | 60      |
| Albumin 4. | Correlation Coefficient | -,273* | -0,092 | -,256*  | -0,176  |
|            | Sig. (2-tailed)         | 0,035  | 0,482  | 0,048   | 0,178   |
|            | N                       | 60     | 60     | 60      | 60      |
| Albumin 5. | Correlation Coefficient | -0,196 | -0,121 | -0,234  | -0,178  |
|            | Sig. (2-tailed)         | 0,133  | 0,359  | 0,072   | 0,173   |
|            | N                       | 60     | 60     | 60      | 60      |
| Albumin 6. | Correlation Coefficient | -,286* | -,328* | -,361** | -,427** |
|            | Sig. (2-tailed)         | 0,027  | 0,010  | 0,005   | 0,001   |
|            | N                       | 60     | 60     | 60      | 60      |

|             |                         |                   |        |        |        |
|-------------|-------------------------|-------------------|--------|--------|--------|
| Fibrinog.1. | Correlation Coefficient | 0,040             | -0,073 | -0,006 | 0,069  |
|             | Sig. (2-tailed)         | 0,760             | 0,578  | 0,964  | 0,600  |
|             | N                       | 60                | 60     | 60     | 60     |
| Fibrinog.2. | Correlation Coefficient | 0,133             | 0,092  | 0,063  | 0,183  |
|             | Sig. (2-tailed)         | 0,314             | 0,488  | 0,635  | 0,165  |
|             | N                       | 59                | 59     | 59     | 59     |
| Fibrinog.3. | Correlation Coefficient | ,329 <sup>†</sup> | 0,167  | 0,246  | 0,191  |
|             | Sig. (2-tailed)         | 0,010             | 0,202  | 0,058  | 0,143  |
|             | N                       | 60                | 60     | 60     | 60     |
| Fibrinog.4. | Correlation Coefficient | 0,126             | 0,074  | 0,074  | 0,127  |
|             | Sig. (2-tailed)         | 0,338             | 0,575  | 0,575  | 0,335  |
|             | N                       | 60                | 60     | 60     | 60     |
| Fibrinog.5. | Correlation Coefficient | -0,014            | -0,149 | -0,042 | -0,113 |
|             | Sig. (2-tailed)         | 0,915             | 0,256  | 0,750  | 0,389  |
|             | N                       | 60                | 60     | 60     | 60     |
| Fibrinog.6. | Correlation Coefficient | -0,083            | -0,225 | -0,101 | -0,241 |
|             | Sig. (2-tailed)         | 0,531             | 0,084  | 0,445  | 0,063  |
|             | N                       | 60                | 60     | 60     | 60     |
| Hb 1        | Correlation Coefficient | -0,047            | -0,099 | -0,082 | -0,174 |
|             | Sig. (2-tailed)         | 0,722             | 0,453  | 0,535  | 0,184  |
|             | N                       | 60                | 60     | 60     | 60     |
| Hb 2        | Correlation Coefficient | -0,159            | -0,099 | -0,187 | -0,171 |
|             | Sig. (2-tailed)         | 0,229             | 0,455  | 0,156  | 0,196  |
|             | N                       | 59                | 59     | 59     | 59     |
| Hb 3        | Correlation Coefficient | -0,099            | -0,011 | -0,124 | -0,063 |
|             | Sig. (2-tailed)         | 0,455             | 0,935  | 0,349  | 0,633  |
|             | N                       | 59                | 59     | 59     | 59     |
| Hb 4        | Correlation Coefficient | -0,255            | -0,052 | -0,236 | -0,032 |
|             | Sig. (2-tailed)         | 0,051             | 0,694  | 0,072  | 0,812  |
|             | N                       | 59                | 59     | 59     | 59     |
| Hb 5        | Correlation Coefficient | -0,174            | -0,147 | -0,186 | -0,151 |
|             | Sig. (2-tailed)         | 0,183             | 0,263  | 0,154  | 0,248  |
|             | N                       | 60                | 60     | 60     | 60     |

|       |                         |        |        |        |        |
|-------|-------------------------|--------|--------|--------|--------|
| Hb 6  | Correlation Coefficient | -0,051 | 0,097  | -0,055 | 0,031  |
|       | Sig. (2-tailed)         | 0,700  | 0,461  | 0,678  | 0,814  |
|       | N                       | 60     | 60     | 60     | 60     |
| PLT 1 | Correlation Coefficient | -0,071 | -0,064 | -0,023 | 0,027  |
|       | Sig. (2-tailed)         | 0,591  | 0,630  | 0,859  | 0,838  |
|       | N                       | 60     | 60     | 60     | 60     |
| PLT 2 | Correlation Coefficient | -0,082 | -0,070 | -0,095 | -0,109 |
|       | Sig. (2-tailed)         | 0,543  | 0,601  | 0,479  | 0,415  |
|       | N                       | 58     | 58     | 58     | 58     |
| PLT 3 | Correlation Coefficient | -0,013 | -0,050 | -0,008 | -0,013 |
|       | Sig. (2-tailed)         | 0,922  | 0,710  | 0,955  | 0,920  |
|       | N                       | 58     | 58     | 58     | 58     |
| PLT 4 | Correlation Coefficient | -0,187 | -0,039 | -0,129 | -0,089 |
|       | Sig. (2-tailed)         | 0,153  | 0,766  | 0,327  | 0,500  |
|       | N                       | 60     | 60     | 60     | 60     |
| PLT 5 | Correlation Coefficient | -0,197 | -0,089 | -0,152 | -0,075 |
|       | Sig. (2-tailed)         | 0,131  | 0,500  | 0,247  | 0,567  |
|       | N                       | 60     | 60     | 60     | 60     |
| PLT 6 | Correlation Coefficient | -0,152 | -0,218 | -0,153 | -,262* |
|       | Sig. (2-tailed)         | 0,252  | 0,098  | 0,246  | 0,045  |
|       | N                       | 59     | 59     | 59     | 59     |



**Table 7.** Kruskal Wallis test for testing the association between inflammatory mediators and biochemical parameters with eight different types of surgical procedures (p value = 0.0018 after Bonferroni correction for multiple comparisons).

|                | Kruskal-Wallis H | df | Asymp. Sig. |
|----------------|------------------|----|-------------|
| TNF $\alpha$ 1 | 10,101           | 7  | 0,183       |
| TNF $\alpha$ 2 | 5,614            | 7  | 0,585       |
| TNF $\alpha$ 3 | 8,530            | 7  | 0,288       |
| TNF $\alpha$ 4 | 2,907            | 7  | 0,894       |
| TNF $\alpha$ 5 | 7,594            | 7  | 0,370       |
| TNF $\alpha$ 6 | 3,684            | 7  | 0,815       |
| IL-1 1.        | 4,573            | 7  | 0,712       |
| IL-1 2.        | 9,423            | 7  | 0,224       |
| IL-1 3.        | 7,986            | 7  | 0,334       |
| IL-1 4.        | 5,717            | 7  | 0,573       |
| IL-1 5.        | 8,662            | 7  | 0,278       |
| IL-1 6.        | 15,930           | 7  | 0,026       |
| IL-6 1.        | 16,253           | 7  | 0,023       |
| IL-6 2.        | 7,171            | 7  | 0,411       |
| IL-6 3.        | 5,166            | 7  | 0,640       |
| IL-6 4.        | 5,618            | 7  | 0,585       |
| IL-6 5.        | 6,405            | 7  | 0,493       |
| IL-6 6.        | 10,713           | 7  | 0,152       |
| IL-8 1.        | 3,130            | 7  | 0,873       |
| IL-8 2.        | 3,953            | 7  | 0,785       |
| IL-8 3.        | 1,972            | 7  | 0,961       |
| IL-8 4.        | 10,041           | 7  | 0,186       |
| IL-8 5.        | 6,020            | 7  | 0,537       |
| IL-8 6.        | 3,305            | 7  | 0,855       |
| IL-10 1.       | 5,768            | 7  | 0,567       |
| IL-10 2.       | 6,539            | 7  | 0,478       |
| IL-10 3.       | 8,368            | 7  | 0,301       |

|             |        |   |       |
|-------------|--------|---|-------|
| IL-10 4.    | 8,157  | 7 | 0,319 |
| IL-10 5.    | 3,065  | 7 | 0,879 |
| IL-10 6.    | 6,560  | 7 | 0,476 |
| C5a 1.      | 10,155 | 7 | 0,180 |
| C5a 2.      | 7,508  | 7 | 0,378 |
| C5a 3.      | 6,978  | 7 | 0,431 |
| C5a 4.      | 5,345  | 7 | 0,618 |
| C5a 5.      | 6,991  | 7 | 0,430 |
| C5a 6.      | 3,265  | 7 | 0,859 |
| hs-CRP 1.   | 6,041  | 7 | 0,535 |
| hs-CRP 2.   | 6,460  | 7 | 0,487 |
| hs-CRP 3.   | 7,586  | 7 | 0,371 |
| hs-CRP 4.   | 10,146 | 7 | 0,180 |
| hs-CRP 5.   | 9,842  | 7 | 0,198 |
| Le 4.       | 4,606  | 7 | 0,708 |
| Le 5.       | 7,456  | 7 | 0,383 |
| Le 6.       | 7,261  | 7 | 0,402 |
| Albumin 1.  | 5,847  | 7 | 0,558 |
| Albumin 2.  | 6,974  | 7 | 0,432 |
| Albumin 3.  | 11,948 | 7 | 0,102 |
| Albumin 4.  | 13,669 | 7 | 0,057 |
| Albumin 5.  | 12,877 | 7 | 0,075 |
| Albumin 6.  | 14,608 | 7 | 0,041 |
| Fibrinog.1. | 9,573  | 7 | 0,214 |
| Fibrinog.2. | 7,351  | 7 | 0,393 |
| Fibrinog.3. | 12,095 | 7 | 0,097 |
| Fibrinog.4. | 7,175  | 7 | 0,411 |
| Fibrinog.5. | 16,472 | 7 | 0,021 |
| Fibrinog.6. | 18,073 | 7 | 0,012 |
| CD64 lim1   | 13,704 | 7 | 0,057 |
| CD64 lim2   | 6,798  | 7 | 0,450 |
| CD64 lim3   | 8,600  | 7 | 0,283 |
| CD64 lim4   | 6,827  | 7 | 0,447 |

|           |        |   |       |
|-----------|--------|---|-------|
| CD64 lim5 | 6,664  | 7 | 0,465 |
| CD64 lim6 | 6,354  | 7 | 0,499 |
| CD64mo1   | 11,022 | 7 | 0,138 |
| CD64mo2   | 7,395  | 7 | 0,389 |
| CD64mo3   | 5,487  | 7 | 0,601 |
| CD64mo4   | 4,382  | 7 | 0,735 |
| CD64mo5   | 6,620  | 7 | 0,469 |
| CD64mo6   | 10,654 | 7 | 0,154 |
| CD64gra1  | 17,562 | 7 | 0,014 |
| CD64gra2  | 7,466  | 7 | 0,382 |
| CD64gra3  | 1,879  | 7 | 0,966 |
| CD64gra4  | 6,130  | 7 | 0,525 |
| CD64gra5  | 6,119  | 7 | 0,526 |
| CD64gra6  | 10,947 | 7 | 0,141 |
| CD163lim1 | 5,529  | 7 | 0,596 |
| CD163lim2 | 10,208 | 7 | 0,177 |
| CD163lim3 | 4,578  | 7 | 0,711 |
| CD163lim4 | 9,462  | 7 | 0,221 |
| CD163lim5 | 6,409  | 7 | 0,493 |
| CD163lim6 | 5,335  | 7 | 0,619 |
| CD163mo1  | 12,269 | 7 | 0,092 |
| CD163mo2  | 6,686  | 7 | 0,462 |
| CD163mo3  | 7,017  | 7 | 0,427 |
| CD163mo4  | 5,408  | 7 | 0,610 |
| CD163mo5  | 5,790  | 7 | 0,564 |
| CD163mo6  | 5,575  | 7 | 0,590 |
| CD163gra1 | 5,846  | 7 | 0,558 |
| CD163gra2 | 10,922 | 7 | 0,142 |
| CD163gra3 | 4,735  | 7 | 0,692 |
| CD163gra4 | 4,578  | 7 | 0,711 |
| CD163gra5 | 4,537  | 7 | 0,716 |
| CD163gra6 | 8,254  | 7 | 0,311 |
| Hb 1      | 6,501  | 7 | 0,483 |

|       |        |   |       |
|-------|--------|---|-------|
| Hb 2  | 9,560  | 7 | 0,215 |
| Hb 3  | 7,470  | 7 | 0,382 |
| Hb 4  | 10,546 | 7 | 0,160 |
| Hb 5  | 16,271 | 7 | 0,023 |
| Hb 6  | 12,022 | 7 | 0,100 |
| PLT 1 | 9,980  | 7 | 0,190 |
| PLT 2 | 3,482  | 7 | 0,837 |
| PLT 3 | 12,625 | 7 | 0,082 |
| PLT 4 | 17,915 | 7 | 0,012 |
| PLT 5 | 17,948 | 7 | 0,012 |
| PLT 6 | 20,657 | 7 | 0,004 |

**Coding of different types of surgical procedures:**

- 1- One valve surgery + CABG
- 2 - More than one valve surgery + CABG
- 3 - More than one valve surgery
- 4 - Surgery of ascending aorta
- 5 - Valve surgery + CABG + surgery of ascending aorta
- 6 - Valve surgery + surgery of ascending aorta
- 7 - Valve surgery + other procedures (ASD, RFA)
- 8 - Valve surgery + surgery of ascending aorta + other procedure (ASD, RFA)

**Table 8.** Range values in groups of different surgical procedures.

|                        |       | Ranks |           |
|------------------------|-------|-------|-----------|
| surgical procedure 1-8 |       | N     | Mean Rank |
| TNF $\alpha$ 1         | 1     | 20    | 30,15     |
|                        | 2     | 3     | 45,50     |
|                        | 3     | 13    | 28,62     |
|                        | 4     | 11    | 27,05     |
|                        | 5     | 2     | 9,00      |
|                        | 6     | 8     | 35,75     |
|                        | 7     | 2     | 51,00     |
|                        | 8     | 1     | 15,00     |
|                        | Total | 60    |           |
| TNF $\alpha$ 2         | 1     | 20    | 29,40     |
|                        | 2     | 3     | 40,17     |
|                        | 3     | 13    | 27,69     |
|                        | 4     | 11    | 31,41     |
|                        | 5     | 2     | 16,00     |
|                        | 6     | 8     | 34,88     |
|                        | 7     | 2     | 45,50     |
|                        | 8     | 1     | 14,00     |
|                        | Total | 60    |           |
| TNF $\alpha$ 3         | 1     | 20    | 30,50     |
|                        | 2     | 3     | 44,00     |
|                        | 3     | 13    | 22,85     |
|                        | 4     | 11    | 36,45     |
|                        | 5     | 2     | 21,00     |
|                        | 6     | 8     | 36,00     |
|                        | 7     | 2     | 25,00     |
|                        | 8     | 1     | 10,00     |
|                        | Total | 60    |           |
| TNF $\alpha$ 4         | 1     | 20    | 30,60     |
|                        | 2     | 3     | 25,33     |

|                |       |    |       |
|----------------|-------|----|-------|
|                | 3     | 13 | 27,04 |
|                | 4     | 11 | 33,82 |
|                | 5     | 2  | 33,00 |
|                | 6     | 8  | 34,44 |
|                | 7     | 2  | 33,00 |
|                | 8     | 1  | 11,00 |
|                | Total | 60 |       |
| TNF5           | 1     | 20 | 30,35 |
|                | 2     | 3  | 39,33 |
|                | 3     | 13 | 22,85 |
|                | 4     | 11 | 28,82 |
|                | 5     | 2  | 32,50 |
|                | 6     | 8  | 35,25 |
|                | 7     | 2  | 42,50 |
|                | 8     | 1  | 59,00 |
|                | Total | 60 |       |
| TNF $\alpha$ 6 | 1     | 20 | 33,83 |
|                | 2     | 3  | 39,00 |
|                | 3     | 13 | 29,81 |
|                | 4     | 11 | 26,18 |
|                | 5     | 2  | 31,50 |
|                | 6     | 8  | 30,38 |
|                | 7     | 2  | 20,50 |
|                | 8     | 1  | 14,00 |
|                | Total | 60 |       |
| IL-1 1.        | 1     | 20 | 29,30 |
|                | 2     | 3  | 26,67 |
|                | 3     | 13 | 25,35 |
|                | 4     | 11 | 30,95 |
|                | 5     | 2  | 28,50 |
|                | 6     | 8  | 40,63 |
|                | 7     | 2  | 38,00 |
|                | 8     | 1  | 36,00 |

|         |       |    |       |
|---------|-------|----|-------|
|         | Total | 60 |       |
| IL-1 2. | 1     | 20 | 25,75 |
|         | 2     | 3  | 46,83 |
|         | 3     | 13 | 33,65 |
|         | 4     | 11 | 28,36 |
|         | 5     | 2  | 21,00 |
|         | 6     | 8  | 30,63 |
|         | 7     | 2  | 55,50 |
|         | 8     | 1  | 27,00 |
|         | Total | 60 |       |
| IL-1 3. | 1     | 20 | 26,28 |
|         | 2     | 3  | 31,67 |
|         | 3     | 13 | 34,38 |
|         | 4     | 11 | 25,05 |
|         | 5     | 2  | 54,50 |
|         | 6     | 8  | 36,25 |
|         | 7     | 2  | 34,00 |
|         | 8     | 1  | 20,00 |
|         | Total | 60 |       |
| IL-1 4. | 1     | 20 | 27,40 |
|         | 2     | 3  | 22,33 |
|         | 3     | 13 | 31,92 |
|         | 4     | 11 | 29,45 |
|         | 5     | 2  | 54,50 |
|         | 6     | 8  | 34,63 |
|         | 7     | 2  | 32,00 |
|         | 8     | 1  | 26,00 |
|         | Total | 60 |       |
| IL-1 5. | 1     | 20 | 27,50 |
|         | 2     | 3  | 42,67 |
|         | 3     | 13 | 32,38 |
|         | 4     | 11 | 23,36 |
|         | 5     | 2  | 39,00 |

|         |       |    |       |
|---------|-------|----|-------|
|         | 6     | 8  | 34,00 |
|         | 7     | 2  | 53,00 |
|         | 8     | 1  | 18,00 |
|         | Total | 60 |       |
| IL-1 6. | 1     | 20 | 24,85 |
|         | 2     | 3  | 42,00 |
|         | 3     | 13 | 27,81 |
|         | 4     | 11 | 24,41 |
|         | 5     | 2  | 26,00 |
|         | 6     | 8  | 47,00 |
|         | 7     | 2  | 49,50 |
|         | 8     | 1  | 50,00 |
|         | Total | 60 |       |
| IL-6 1. | 1     | 20 | 35,85 |
|         | 2     | 3  | 48,67 |
|         | 3     | 13 | 24,69 |
|         | 4     | 11 | 15,91 |
|         | 5     | 2  | 30,50 |
|         | 6     | 8  | 38,63 |
|         | 7     | 2  | 36,50 |
|         | 8     | 1  | 28,00 |
|         | Total | 60 |       |
| IL-6 2. | 1     | 20 | 25,80 |
|         | 2     | 3  | 47,67 |
|         | 3     | 13 | 36,27 |
|         | 4     | 11 | 25,45 |
|         | 5     | 2  | 31,50 |
|         | 6     | 8  | 31,81 |
|         | 7     | 2  | 38,00 |
|         | 8     | 1  | 26,00 |
|         | Total | 60 |       |
| IL-6 3. | 1     | 20 | 27,15 |
|         | 2     | 3  | 36,33 |



|         |       |    |       |
|---------|-------|----|-------|
|         | 3     | 13 | 36,38 |
|         | 4     | 11 | 27,77 |
|         | 5     | 2  | 32,50 |
|         | 6     | 8  | 34,81 |
|         | 7     | 2  | 23,50 |
|         | 8     | 1  | 9,00  |
|         | Total | 60 |       |
| IL-6 4. | 1     | 20 | 26,83 |
|         | 2     | 3  | 29,33 |
|         | 3     | 13 | 31,00 |
|         | 4     | 11 | 33,36 |
|         | 5     | 2  | 41,00 |
|         | 6     | 8  | 37,06 |
|         | 7     | 2  | 27,00 |
|         | 8     | 1  | 3,00  |
|         | Total | 60 |       |
| IL-6 5. | 1     | 20 | 27,98 |
|         | 2     | 3  | 32,33 |
|         | 3     | 13 | 26,38 |
|         | 4     | 11 | 32,23 |
|         | 5     | 2  | 36,50 |
|         | 6     | 8  | 40,75 |
|         | 7     | 2  | 35,50 |
|         | 8     | 1  | 6,00  |
|         | Total | 60 |       |
| IL-6 6. | 1     | 20 | 26,83 |
|         | 2     | 3  | 48,00 |
|         | 3     | 13 | 21,92 |
|         | 4     | 11 | 34,23 |
|         | 5     | 2  | 31,50 |
|         | 6     | 8  | 37,75 |
|         | 7     | 2  | 47,00 |
|         | 8     | 1  | 29,00 |

|         |       |    |       |
|---------|-------|----|-------|
|         | Total | 60 |       |
| IL-8 1. | 1     | 20 | 33,30 |
|         | 2     | 3  | 36,50 |
|         | 3     | 13 | 26,77 |
|         | 4     | 11 | 25,50 |
|         | 5     | 2  | 26,75 |
|         | 6     | 8  | 34,38 |
|         | 7     | 2  | 36,00 |
|         | 8     | 1  | 25,50 |
|         | Total | 60 |       |
| IL-8 2. | 1     | 20 | 30,33 |
|         | 2     | 3  | 29,00 |
|         | 3     | 13 | 35,00 |
|         | 4     | 11 | 26,45 |
|         | 5     | 2  | 26,75 |
|         | 6     | 8  | 28,00 |
|         | 7     | 2  | 47,00 |
|         | 8     | 1  | 19,00 |
|         | Total | 60 |       |
| IL-8 3. | 1     | 20 | 29,73 |
|         | 2     | 3  | 32,67 |
|         | 3     | 13 | 34,46 |
|         | 4     | 11 | 29,09 |
|         | 5     | 2  | 24,75 |
|         | 6     | 8  | 31,75 |
|         | 7     | 2  | 25,00 |
|         | 8     | 1  | 16,00 |
|         | Total | 60 |       |
| IL-8 4. | 1     | 20 | 31,70 |
|         | 2     | 3  | 26,67 |
|         | 3     | 13 | 29,08 |
|         | 4     | 11 | 24,45 |
|         | 5     | 2  | 58,00 |

|          |       |    |       |
|----------|-------|----|-------|
|          | 6     | 8  | 33,50 |
|          | 7     | 2  | 41,00 |
|          | 8     | 1  | 3,00  |
|          | Total | 60 |       |
| IL-8 5.  | 1     | 20 | 32,23 |
|          | 2     | 3  | 31,50 |
|          | 3     | 13 | 30,19 |
|          | 4     | 11 | 23,82 |
|          | 5     | 2  | 47,50 |
|          | 6     | 8  | 26,31 |
|          | 7     | 2  | 41,00 |
|          | 8     | 1  | 49,00 |
|          | Total | 60 |       |
| IL-8 6.  | 1     | 20 | 33,20 |
|          | 2     | 3  | 31,33 |
|          | 3     | 13 | 29,85 |
|          | 4     | 11 | 25,45 |
|          | 5     | 2  | 38,50 |
|          | 6     | 8  | 32,56 |
|          | 7     | 2  | 28,00 |
|          | 8     | 1  | 10,50 |
|          | Total | 60 |       |
| IL-10 1. | 1     | 20 | 30,28 |
|          | 2     | 3  | 41,33 |
|          | 3     | 13 | 30,92 |
|          | 4     | 11 | 24,14 |
|          | 5     | 2  | 14,75 |
|          | 6     | 8  | 36,13 |
|          | 7     | 2  | 40,50 |
|          | 8     | 1  | 33,50 |
|          | Total | 60 |       |
| IL-10 2. | 1     | 20 | 30,03 |
|          | 2     | 3  | 39,00 |

|          |       |    |       |
|----------|-------|----|-------|
|          | 3     | 13 | 26,00 |
|          | 4     | 11 | 24,95 |
|          | 5     | 2  | 32,50 |
|          | 6     | 8  | 37,88 |
|          | 7     | 2  | 38,50 |
|          | 8     | 1  | 55,00 |
|          | Total | 60 |       |
| IL-10 3. | 1     | 20 | 30,50 |
|          | 2     | 3  | 42,00 |
|          | 3     | 13 | 24,69 |
|          | 4     | 11 | 24,32 |
|          | 5     | 2  | 41,50 |
|          | 6     | 8  | 34,88 |
|          | 7     | 2  | 47,75 |
|          | 8     | 1  | 48,00 |
|          | Total | 60 |       |
| IL-10 4. | 1     | 20 | 32,58 |
|          | 2     | 3  | 25,33 |
|          | 3     | 13 | 28,58 |
|          | 4     | 11 | 29,27 |
|          | 5     | 2  | 41,00 |
|          | 6     | 8  | 26,38 |
|          | 7     | 2  | 55,50 |
|          | 8     | 1  | 5,00  |
|          | Total | 60 |       |
| IL-10 5. | 1     | 20 | 28,85 |
|          | 2     | 3  | 39,00 |
|          | 3     | 13 | 29,54 |
|          | 4     | 11 | 30,55 |
|          | 5     | 2  | 30,50 |
|          | 6     | 8  | 31,31 |
|          | 7     | 2  | 44,75 |
|          | 8     | 1  | 15,00 |

|          |       |    |       |
|----------|-------|----|-------|
|          | Total | 60 |       |
| IL-10 6. | 1     | 20 | 30,40 |
|          | 2     | 3  | 42,00 |
|          | 3     | 13 | 30,00 |
|          | 4     | 11 | 26,27 |
|          | 5     | 2  | 19,50 |
|          | 6     | 8  | 30,88 |
|          | 7     | 2  | 54,00 |
|          | 8     | 1  | 23,00 |
|          | Total | 60 |       |
| C5a 1.   | 1     | 20 | 30,68 |
|          | 2     | 3  | 19,67 |
|          | 3     | 13 | 20,73 |
|          | 4     | 11 | 37,73 |
|          | 5     | 2  | 45,00 |
|          | 6     | 8  | 31,63 |
|          | 7     | 2  | 42,50 |
|          | 8     | 1  | 45,00 |
|          | Total | 60 |       |
| C5a 2.   | 1     | 20 | 36,05 |
|          | 2     | 3  | 10,67 |
|          | 3     | 13 | 28,15 |
|          | 4     | 11 | 27,55 |
|          | 5     | 2  | 42,50 |
|          | 6     | 8  | 29,00 |
|          | 7     | 2  | 28,50 |
|          | 8     | 1  | 34,00 |
|          | Total | 60 |       |
| C5a 3.   | 1     | 20 | 31,73 |
|          | 2     | 3  | 11,50 |
|          | 3     | 13 | 27,38 |
|          | 4     | 11 | 37,55 |
|          | 5     | 2  | 24,00 |

|           |       |    |       |
|-----------|-------|----|-------|
|           | 6     | 8  | 30,38 |
|           | 7     | 2  | 27,50 |
|           | 8     | 1  | 46,00 |
|           | Total | 60 |       |
| C5a 4.    | 1     | 20 | 29,00 |
|           | 2     | 3  | 15,33 |
|           | 3     | 13 | 32,85 |
|           | 4     | 11 | 36,18 |
|           | 5     | 2  | 38,50 |
|           | 6     | 8  | 26,38 |
|           | 7     | 2  | 24,50 |
|           | 8     | 1  | 42,00 |
|           | Total | 60 |       |
| C5a 5.    | 1     | 20 | 25,35 |
|           | 2     | 3  | 31,33 |
|           | 3     | 13 | 32,92 |
|           | 4     | 11 | 40,00 |
|           | 5     | 2  | 26,00 |
|           | 6     | 8  | 29,50 |
|           | 7     | 2  | 16,50 |
|           | 8     | 1  | 40,00 |
|           | Total | 60 |       |
| C5a 6.    | 1     | 20 | 34,10 |
|           | 2     | 3  | 24,67 |
|           | 3     | 13 | 24,54 |
|           | 4     | 11 | 32,73 |
|           | 5     | 2  | 33,00 |
|           | 6     | 8  | 28,13 |
|           | 7     | 2  | 33,50 |
|           | 8     | 1  | 37,00 |
|           | Total | 60 |       |
| hs-CRP 1. | 1     | 20 | 32,55 |
|           | 2     | 3  | 31,00 |

|           |       |    |       |
|-----------|-------|----|-------|
|           | 3     | 13 | 34,46 |
|           | 4     | 11 | 20,09 |
|           | 5     | 2  | 31,00 |
|           | 6     | 8  | 35,13 |
|           | 7     | 2  | 28,50 |
|           | 8     | 1  | 17,00 |
|           | Total | 60 |       |
| hs-CRP 2. | 1     | 20 | 28,60 |
|           | 2     | 3  | 36,00 |
|           | 3     | 13 | 35,73 |
|           | 4     | 11 | 21,18 |
|           | 5     | 2  | 34,00 |
|           | 6     | 8  | 37,56 |
|           | 7     | 2  | 31,00 |
|           | 8     | 1  | 22,00 |
|           | Total | 60 |       |
| hs-CRP 3. | 1     | 20 | 31,60 |
|           | 2     | 3  | 38,67 |
|           | 3     | 13 | 34,88 |
|           | 4     | 11 | 18,86 |
|           | 5     | 2  | 29,50 |
|           | 6     | 8  | 34,88 |
|           | 7     | 2  | 33,00 |
|           | 8     | 1  | 17,00 |
|           | Total | 60 |       |
| hs-CRP 4. | 1     | 20 | 32,95 |
|           | 2     | 3  | 10,00 |
|           | 3     | 13 | 31,08 |
|           | 4     | 11 | 37,09 |
|           | 5     | 2  | 35,75 |
|           | 6     | 8  | 27,75 |
|           | 7     | 2  | 15,25 |
|           | 8     | 1  | 5,00  |

|           |       |    |       |
|-----------|-------|----|-------|
|           | Total | 60 |       |
| hs-CRP 5. | 1     | 20 | 28,90 |
|           | 2     | 3  | 10,33 |
|           | 3     | 13 | 31,23 |
|           | 4     | 11 | 39,41 |
|           | 5     | 2  | 29,25 |
|           | 6     | 8  | 34,38 |
|           | 7     | 2  | 20,00 |
|           | 8     | 1  | 8,00  |
|           | Total | 60 |       |
| hs-CRP 6. | 1     | 20 | 32,05 |
|           | 2     | 3  | 22,50 |
|           | 3     | 13 | 25,81 |
|           | 4     | 11 | 39,09 |
|           | 5     | 2  | 31,50 |
|           | 6     | 8  | 32,13 |
|           | 7     | 2  | 15,00 |
|           | 8     | 1  | 6,00  |
|           | Total | 60 |       |
| PCT 1.    | 1     | 20 | 32,75 |
|           | 2     | 3  | 38,00 |
|           | 3     | 13 | 35,12 |
|           | 4     | 11 | 22,14 |
|           | 5     | 2  | 20,25 |
|           | 6     | 8  | 27,13 |
|           | 7     | 2  | 31,50 |
|           | 8     | 1  | 40,50 |
|           | Total | 60 |       |
| PCT 2.    | 1     | 20 | 30,68 |
|           | 2     | 3  | 36,67 |
|           | 3     | 13 | 38,12 |
|           | 4     | 11 | 30,00 |
|           | 5     | 2  | 22,25 |



|        |       |    |       |
|--------|-------|----|-------|
|        | 6     | 8  | 22,13 |
|        | 7     | 2  | 14,50 |
|        | 8     | 1  | 30,50 |
|        | Total | 60 |       |
| PCT 3. | 1     | 20 | 29,45 |
|        | 2     | 3  | 47,67 |
|        | 3     | 13 | 36,77 |
|        | 4     | 11 | 30,68 |
|        | 5     | 2  | 20,25 |
|        | 6     | 8  | 22,06 |
|        | 7     | 2  | 19,25 |
|        | 8     | 1  | 27,00 |
|        | Total | 60 |       |
| PCT 4. | 1     | 20 | 28,90 |
|        | 2     | 3  | 40,83 |
|        | 3     | 13 | 34,27 |
|        | 4     | 11 | 28,36 |
|        | 5     | 2  | 20,50 |
|        | 6     | 8  | 33,63 |
|        | 7     | 2  | 26,00 |
|        | 8     | 1  | 10,00 |
|        | Total | 60 |       |
| PCT 5. | 1     | 20 | 29,43 |
|        | 2     | 3  | 41,50 |
|        | 3     | 13 | 35,46 |
|        | 4     | 11 | 27,59 |
|        | 5     | 2  | 23,75 |
|        | 6     | 8  | 30,69 |
|        | 7     | 2  | 24,25 |
|        | 8     | 1  | 11,00 |
|        | Total | 60 |       |
| PCT 6. | 1     | 20 | 30,80 |
|        | 2     | 3  | 38,17 |

|       |       |    |       |
|-------|-------|----|-------|
|       | 3     | 13 | 33,23 |
|       | 4     | 11 | 24,41 |
|       | 5     | 2  | 6,25  |
|       | 6     | 8  | 36,19 |
|       | 7     | 2  | 45,00 |
|       | 8     | 1  | 7,00  |
|       | Total | 60 |       |
| Le 1. | 1     | 20 | 34,55 |
|       | 2     | 3  | 30,00 |
|       | 3     | 13 | 23,12 |
|       | 4     | 11 | 29,05 |
|       | 5     | 2  | 55,00 |
|       | 6     | 8  | 35,13 |
|       | 7     | 2  | 17,50 |
|       | 8     | 1  | 3,00  |
|       | Total | 60 |       |
| Le 2. | 1     | 20 | 34,28 |
|       | 2     | 3  | 43,33 |
|       | 3     | 12 | 29,54 |
|       | 4     | 11 | 19,50 |
|       | 5     | 2  | 27,50 |
|       | 6     | 8  | 29,81 |
|       | 7     | 2  | 35,00 |
|       | 8     | 1  | 22,00 |
|       | Total | 59 |       |
| Le 3. | 1     | 20 | 36,80 |
|       | 2     | 3  | 37,17 |
|       | 3     | 13 | 24,54 |
|       | 4     | 11 | 30,05 |
|       | 5     | 2  | 41,00 |
|       | 6     | 8  | 21,25 |
|       | 7     | 2  | 39,00 |
|       | 8     | 1  | 3,00  |

|            |       |    |       |
|------------|-------|----|-------|
|            | Total | 60 |       |
| Le 4.      | 1     | 20 | 34,15 |
|            | 2     | 3  | 24,50 |
|            | 3     | 12 | 30,88 |
|            | 4     | 11 | 28,95 |
|            | 5     | 2  | 30,50 |
|            | 6     | 8  | 26,69 |
|            | 7     | 2  | 23,50 |
|            | 8     | 1  | 3,00  |
|            | Total | 59 |       |
| Le 5.      | 1     | 20 | 35,90 |
|            | 2     | 3  | 25,33 |
|            | 3     | 13 | 24,58 |
|            | 4     | 11 | 35,00 |
|            | 5     | 2  | 28,00 |
|            | 6     | 8  | 28,44 |
|            | 7     | 2  | 22,50 |
|            | 8     | 1  | 3,00  |
|            | Total | 60 |       |
| Le 6.      | 1     | 20 | 37,23 |
|            | 2     | 3  | 31,83 |
|            | 3     | 13 | 22,19 |
|            | 4     | 11 | 30,23 |
|            | 5     | 2  | 30,25 |
|            | 6     | 8  | 31,44 |
|            | 7     | 2  | 18,50 |
|            | 8     | 1  | 20,00 |
|            | Total | 60 |       |
| Albumin 1. | 1     | 20 | 32,80 |
|            | 2     | 3  | 28,67 |
|            | 3     | 13 | 25,50 |
|            | 4     | 11 | 36,86 |
|            | 5     | 2  | 33,50 |

|            |       |    |       |
|------------|-------|----|-------|
|            | 6     | 8  | 30,06 |
|            | 7     | 2  | 18,25 |
|            | 8     | 1  | 7,00  |
|            | Total | 60 |       |
| Albumin 2. | 1     | 20 | 25,23 |
|            | 2     | 3  | 43,83 |
|            | 3     | 13 | 29,00 |
|            | 4     | 11 | 29,23 |
|            | 5     | 2  | 31,75 |
|            | 6     | 8  | 37,31 |
|            | 7     | 2  | 44,50 |
|            | 8     | 1  | 44,50 |
|            | Total | 60 |       |
| Albumin 3. | 1     | 20 | 21,18 |
|            | 2     | 3  | 48,00 |
|            | 3     | 13 | 30,62 |
|            | 4     | 11 | 33,73 |
|            | 5     | 2  | 37,25 |
|            | 6     | 8  | 37,38 |
|            | 7     | 2  | 36,25 |
|            | 8     | 1  | 47,50 |
|            | Total | 60 |       |
| Albumin 4. | 1     | 20 | 20,78 |
|            | 2     | 3  | 42,17 |
|            | 3     | 13 | 30,46 |
|            | 4     | 11 | 39,36 |
|            | 5     | 2  | 32,25 |
|            | 6     | 8  | 38,25 |
|            | 7     | 2  | 20,75 |
|            | 8     | 1  | 47,00 |
|            | Total | 60 |       |
| Albumin 5. | 1     | 20 | 22,60 |
|            | 2     | 3  | 42,83 |

|             |       |    |       |
|-------------|-------|----|-------|
|             | 3     | 13 | 25,96 |
|             | 4     | 11 | 40,41 |
|             | 5     | 2  | 33,00 |
|             | 6     | 8  | 37,94 |
|             | 7     | 2  | 25,00 |
|             | 8     | 1  | 48,00 |
|             | Total | 60 |       |
| Albumin 6.  | 1     | 20 | 23,63 |
|             | 2     | 3  | 16,17 |
|             | 3     | 13 | 31,00 |
|             | 4     | 11 | 44,64 |
|             | 5     | 2  | 29,75 |
|             | 6     | 8  | 32,31 |
|             | 7     | 2  | 22,25 |
|             | 8     | 1  | 52,50 |
|             | Total | 60 |       |
| Fibrinog.1. | 1     | 20 | 36,60 |
|             | 2     | 3  | 37,33 |
|             | 3     | 13 | 30,58 |
|             | 4     | 11 | 22,95 |
|             | 5     | 2  | 46,00 |
|             | 6     | 8  | 24,56 |
|             | 7     | 2  | 15,75 |
|             | 8     | 1  | 16,00 |
|             | Total | 60 |       |
| Fibrinog.2. | 1     | 20 | 30,65 |
|             | 2     | 3  | 46,00 |
|             | 3     | 12 | 32,04 |
|             | 4     | 11 | 20,86 |
|             | 5     | 2  | 38,75 |
|             | 6     | 8  | 27,06 |
|             | 7     | 2  | 34,00 |
|             | 8     | 1  | 43,00 |

|             |       |    |       |
|-------------|-------|----|-------|
|             | Total | 59 |       |
| Fibrinog.3. | 1     | 20 | 27,90 |
|             | 2     | 3  | 41,33 |
|             | 3     | 13 | 40,58 |
|             | 4     | 11 | 21,77 |
|             | 5     | 2  | 36,75 |
|             | 6     | 8  | 22,88 |
|             | 7     | 2  | 46,25 |
|             | 8     | 1  | 32,00 |
|             | Total | 60 |       |
| Fibrinog.4. | 1     | 20 | 26,73 |
|             | 2     | 3  | 28,17 |
|             | 3     | 13 | 36,08 |
|             | 4     | 11 | 32,00 |
|             | 5     | 2  | 49,00 |
|             | 6     | 8  | 30,63 |
|             | 7     | 2  | 20,00 |
|             | 8     | 1  | 7,00  |
|             | Total | 60 |       |
| Fibrinog.5. | 1     | 20 | 23,98 |
|             | 2     | 3  | 23,17 |
|             | 3     | 13 | 31,96 |
|             | 4     | 11 | 44,64 |
|             | 5     | 2  | 47,25 |
|             | 6     | 8  | 31,13 |
|             | 7     | 2  | 10,50 |
|             | 8     | 1  | 10,00 |
|             | Total | 60 |       |
| Fibrinog.6. | 1     | 20 | 26,40 |
|             | 2     | 3  | 17,83 |
|             | 3     | 13 | 25,00 |
|             | 4     | 11 | 45,55 |
|             | 5     | 2  | 55,50 |

|           |           |    |       |
|-----------|-----------|----|-------|
|           | 6         | 8  | 32,44 |
|           | 7         | 2  | 16,00 |
|           | 8         | 1  | 20,00 |
|           | Total     | 60 |       |
| CD64 lim1 | 1         | 20 | 24,93 |
|           | 2         | 3  | 47,17 |
|           | 3         | 13 | 36,77 |
|           | 4         | 11 | 19,50 |
|           | 5         | 2  | 42,00 |
|           | 6         | 8  | 38,63 |
|           | 7         | 2  | 32,50 |
|           | 8         | 1  | 39,50 |
|           | Total     | 60 |       |
|           | CD64 lim2 | 1  | 20    |
| 2         |           | 3  | 37,67 |
| 3         |           | 13 | 31,81 |
| 4         |           | 11 | 26,05 |
| 5         |           | 2  | 54,50 |
| 6         |           | 8  | 35,44 |
| 7         |           | 2  | 30,50 |
| 8         |           | 1  | 20,00 |
| Total     |           | 60 |       |
| CD64 lim3 |           | 1  | 20    |
|           | 2         | 3  | 46,83 |
|           | 3         | 13 | 30,31 |
|           | 4         | 11 | 27,18 |
|           | 5         | 2  | 56,50 |
|           | 6         | 8  | 32,75 |
|           | 7         | 2  | 30,50 |
|           | 8         | 1  | 25,00 |
|           | Total     | 60 |       |
|           | CD64 lim4 | 1  | 20    |
| 2         |           | 3  | 40,67 |

|           |           |       |       |
|-----------|-----------|-------|-------|
|           | 3         | 13    | 26,96 |
|           | 4         | 11    | 33,82 |
|           | 5         | 2     | 49,50 |
|           | 6         | 8     | 31,94 |
|           | 7         | 2     | 39,50 |
|           | 8         | 1     | 12,00 |
|           | Total     | 60    |       |
|           | CD64 lim5 |       |       |
| 1         | 20        | 26,88 |       |
| 2         | 3         | 38,33 |       |
| 3         | 13        | 32,00 |       |
| 4         | 11        | 33,95 |       |
| 5         | 2         | 49,00 |       |
| 6         | 8         | 28,81 |       |
| 7         | 2         | 27,75 |       |
| 8         | 1         | 4,00  |       |
| Total     | 60        |       |       |
| CD64 lim6 |           |       |       |
| 1         | 20        | 25,93 |       |
| 2         | 3         | 32,17 |       |
| 3         | 13        | 27,85 |       |
| 4         | 11        | 33,09 |       |
| 5         | 2         | 52,50 |       |
| 6         | 8         | 36,81 |       |
| 7         | 2         | 26,75 |       |
| 8         | 1         | 36,00 |       |
| Total     | 60        |       |       |
| CD64mo1   |           |       |       |
| 1         | 20        | 26,10 |       |
| 2         | 3         | 47,67 |       |
| 3         | 13        | 32,77 |       |
| 4         | 11        | 21,64 |       |
| 5         | 2         | 31,00 |       |
| 6         | 8         | 41,00 |       |
| 7         | 2         | 32,00 |       |
| 8         | 1         | 47,00 |       |



|         |       |    |       |
|---------|-------|----|-------|
|         | Total | 60 |       |
| CD64mo2 | 1     | 20 | 28,55 |
|         | 2     | 3  | 43,33 |
|         | 3     | 13 | 29,77 |
|         | 4     | 11 | 22,18 |
|         | 5     | 2  | 36,50 |
|         | 6     | 8  | 39,75 |
|         | 7     | 2  | 32,00 |
|         | 8     | 1  | 43,00 |
|         | Total | 60 |       |
| CD64mo3 | 1     | 20 | 25,80 |
|         | 2     | 3  | 39,00 |
|         | 3     | 13 | 32,15 |
|         | 4     | 11 | 26,18 |
|         | 5     | 2  | 37,00 |
|         | 6     | 8  | 39,13 |
|         | 7     | 2  | 32,00 |
|         | 8     | 1  | 40,00 |
|         | Total | 60 |       |
| CD64mo4 | 1     | 20 | 26,65 |
|         | 2     | 3  | 24,67 |
|         | 3     | 13 | 32,69 |
|         | 4     | 11 | 31,00 |
|         | 5     | 2  | 45,50 |
|         | 6     | 8  | 36,50 |
|         | 7     | 2  | 27,00 |
|         | 8     | 1  | 20,00 |
|         | Total | 60 |       |
| CD64mo5 | 1     | 20 | 26,60 |
|         | 2     | 3  | 19,67 |
|         | 3     | 13 | 30,62 |
|         | 4     | 11 | 32,55 |
|         | 5     | 2  | 37,00 |

|          |       |    |       |
|----------|-------|----|-------|
|          | 6     | 8  | 42,00 |
|          | 7     | 2  | 27,50 |
|          | 8     | 1  | 18,00 |
|          | Total | 60 |       |
| CD64mo6  | 1     | 20 | 24,85 |
|          | 2     | 3  | 26,00 |
|          | 3     | 13 | 26,77 |
|          | 4     | 11 | 33,55 |
|          | 5     | 2  | 49,00 |
|          | 6     | 8  | 44,25 |
|          | 7     | 2  | 25,50 |
|          | 8     | 1  | 35,00 |
|          | Total | 60 |       |
| CD64gra1 | 1     | 20 | 25,25 |
|          | 2     | 3  | 50,33 |
|          | 3     | 13 | 28,54 |
|          | 4     | 11 | 21,09 |
|          | 5     | 2  | 35,50 |
|          | 6     | 8  | 43,75 |
|          | 7     | 2  | 49,00 |
|          | 8     | 1  | 52,00 |
|          | Total | 60 |       |
| CD64gra2 | 1     | 20 | 25,63 |
|          | 2     | 3  | 38,33 |
|          | 3     | 13 | 31,27 |
|          | 4     | 11 | 25,86 |
|          | 5     | 2  | 46,50 |
|          | 6     | 8  | 37,38 |
|          | 7     | 2  | 33,75 |
|          | 8     | 1  | 52,00 |
|          | Total | 60 |       |
| CD64gra3 | 1     | 20 | 28,15 |
|          | 2     | 3  | 35,67 |

|          |          |       |       |
|----------|----------|-------|-------|
|          | 3        | 13    | 31,15 |
|          | 4        | 11    | 27,64 |
|          | 5        | 2     | 34,50 |
|          | 6        | 8     | 34,00 |
|          | 7        | 2     | 34,00 |
|          | 8        | 1     | 42,00 |
|          | Total    | 60    |       |
|          | CD64gra4 |       |       |
| 1        | 20       | 26,80 |       |
| 2        | 3        | 29,00 |       |
| 3        | 13       | 27,15 |       |
| 4        | 11       | 32,36 |       |
| 5        | 2        | 50,00 |       |
| 6        | 8        | 34,00 |       |
| 7        | 2        | 47,00 |       |
| 8        | 1        | 32,00 |       |
| Total    | 60       |       |       |
| CD64gra5 |          |       |       |
| 1        | 20       | 25,20 |       |
| 2        | 3        | 29,33 |       |
| 3        | 13       | 28,46 |       |
| 4        | 11       | 33,18 |       |
| 5        | 2        | 37,00 |       |
| 6        | 8        | 36,00 |       |
| 7        | 2        | 45,00 |       |
| 8        | 1        | 51,00 |       |
| Total    | 60       |       |       |
| CD64gra6 |          |       |       |
| 1        | 20       | 26,73 |       |
| 2        | 3        | 27,00 |       |
| 3        | 13       | 26,31 |       |
| 4        | 11       | 26,55 |       |
| 5        | 2        | 45,00 |       |
| 6        | 8        | 45,19 |       |
| 7        | 2        | 42,50 |       |
| 8        | 1        | 44,00 |       |

|           |       |    |       |
|-----------|-------|----|-------|
|           | Total | 60 |       |
| CD163lim1 | 1     | 20 | 27,38 |
|           | 2     | 3  | 23,67 |
|           | 3     | 13 | 35,12 |
|           | 4     | 11 | 24,82 |
|           | 5     | 2  | 40,75 |
|           | 6     | 8  | 38,44 |
|           | 7     | 2  | 31,50 |
|           | 8     | 1  | 30,00 |
|           | Total | 60 |       |
| CD163lim2 | 1     | 20 | 26,15 |
|           | 2     | 3  | 38,17 |
|           | 3     | 13 | 31,58 |
|           | 4     | 11 | 24,32 |
|           | 5     | 2  | 47,25 |
|           | 6     | 8  | 36,94 |
|           | 7     | 2  | 53,50 |
|           | 8     | 1  | 17,50 |
|           | Total | 60 |       |
| CD163lim3 | 1     | 20 | 28,73 |
|           | 2     | 3  | 40,17 |
|           | 3     | 13 | 29,65 |
|           | 4     | 11 | 25,95 |
|           | 5     | 2  | 47,00 |
|           | 6     | 8  | 34,75 |
|           | 7     | 2  | 35,25 |
|           | 8     | 1  | 21,50 |
|           | Total | 60 |       |
| CD163lim4 | 1     | 20 | 25,83 |
|           | 2     | 3  | 43,33 |
|           | 3     | 13 | 30,58 |
|           | 4     | 11 | 39,86 |
|           | 5     | 2  | 36,50 |

|           |       |    |       |
|-----------|-------|----|-------|
|           | 6     | 8  | 23,69 |
|           | 7     | 2  | 37,75 |
|           | 8     | 1  | 9,50  |
|           | Total | 60 |       |
| CD163lim5 | 1     | 20 | 35,05 |
|           | 2     | 3  | 42,83 |
|           | 3     | 13 | 29,12 |
|           | 4     | 11 | 25,36 |
|           | 5     | 2  | 37,00 |
|           | 6     | 8  | 25,81 |
|           | 7     | 2  | 27,00 |
|           | 8     | 1  | 8,50  |
|           | Total | 60 |       |
| CD163lim6 | 1     | 20 | 25,98 |
|           | 2     | 3  | 44,00 |
|           | 3     | 13 | 29,69 |
|           | 4     | 11 | 33,18 |
|           | 5     | 2  | 47,00 |
|           | 6     | 8  | 29,69 |
|           | 7     | 2  | 30,00 |
|           | 8     | 1  | 36,00 |
|           | Total | 60 |       |
| CD163mo1  | 1     | 20 | 24,20 |
|           | 2     | 3  | 9,33  |
|           | 3     | 13 | 33,77 |
|           | 4     | 11 | 34,00 |
|           | 5     | 2  | 44,00 |
|           | 6     | 8  | 35,88 |
|           | 7     | 2  | 37,00 |
|           | 8     | 1  | 56,00 |
|           | Total | 60 |       |
| CD163mo2  | 1     | 20 | 30,40 |
|           | 2     | 3  | 23,00 |

|          |       |    |       |
|----------|-------|----|-------|
|          | 3     | 13 | 25,85 |
|          | 4     | 11 | 26,91 |
|          | 5     | 2  | 42,50 |
|          | 6     | 8  | 37,25 |
|          | 7     | 2  | 42,50 |
|          | 8     | 1  | 53,00 |
|          | Total | 60 |       |
| CD163mo3 | 1     | 20 | 29,85 |
|          | 2     | 3  | 35,00 |
|          | 3     | 13 | 29,85 |
|          | 4     | 11 | 23,00 |
|          | 5     | 2  | 30,00 |
|          | 6     | 8  | 34,00 |
|          | 7     | 2  | 52,50 |
|          | 8     | 1  | 50,00 |
|          | Total | 60 |       |
| CD163mo4 | 1     | 20 | 29,80 |
|          | 2     | 3  | 39,33 |
|          | 3     | 13 | 31,00 |
|          | 4     | 11 | 24,91 |
|          | 5     | 2  | 36,00 |
|          | 6     | 8  | 27,88 |
|          | 7     | 2  | 46,00 |
|          | 8     | 1  | 52,00 |
|          | Total | 60 |       |
| CD163mo5 | 1     | 20 | 32,15 |
|          | 2     | 3  | 38,00 |
|          | 3     | 13 | 31,04 |
|          | 4     | 11 | 21,36 |
|          | 5     | 2  | 32,50 |
|          | 6     | 8  | 30,44 |
|          | 7     | 2  | 36,00 |
|          | 8     | 1  | 54,00 |

|           |       |    |       |
|-----------|-------|----|-------|
|           | Total | 60 |       |
| CD163mo6  | 1     | 20 | 31,40 |
|           | 2     | 3  | 13,67 |
|           | 3     | 13 | 34,00 |
|           | 4     | 11 | 25,55 |
|           | 5     | 2  | 41,50 |
|           | 6     | 8  | 30,25 |
|           | 7     | 2  | 36,50 |
|           | 8     | 1  | 40,00 |
|           | Total | 60 |       |
| CD163gra1 | 1     | 20 | 30,28 |
|           | 2     | 3  | 25,83 |
|           | 3     | 13 | 31,54 |
|           | 4     | 11 | 22,00 |
|           | 5     | 2  | 31,50 |
|           | 6     | 8  | 40,69 |
|           | 7     | 2  | 35,25 |
|           | 8     | 1  | 36,00 |
|           | Total | 60 |       |
| CD163gra2 | 1     | 20 | 23,68 |
|           | 2     | 3  | 22,17 |
|           | 3     | 13 | 30,88 |
|           | 4     | 11 | 31,95 |
|           | 5     | 2  | 52,00 |
|           | 6     | 8  | 41,56 |
|           | 7     | 2  | 27,25 |
|           | 8     | 1  | 46,00 |
|           | Total | 60 |       |
| CD163gra3 | 1     | 20 | 28,03 |
|           | 2     | 3  | 20,00 |
|           | 3     | 13 | 31,92 |
|           | 4     | 11 | 29,18 |
|           | 5     | 2  | 49,50 |

|           |       |    |       |
|-----------|-------|----|-------|
|           | 6     | 8  | 34,75 |
|           | 7     | 2  | 28,75 |
|           | 8     | 1  | 39,00 |
|           | Total | 60 |       |
| CD163gra4 | 1     | 20 | 32,40 |
|           | 2     | 3  | 33,33 |
|           | 3     | 13 | 26,27 |
|           | 4     | 11 | 25,68 |
|           | 5     | 2  | 41,00 |
|           | 6     | 8  | 30,88 |
|           | 7     | 2  | 38,50 |
|           | 8     | 1  | 52,00 |
|           | Total | 60 |       |
| CD163gra5 | 1     | 20 | 32,28 |
|           | 2     | 3  | 34,17 |
|           | 3     | 13 | 29,04 |
|           | 4     | 11 | 24,23 |
|           | 5     | 2  | 41,75 |
|           | 6     | 8  | 29,50 |
|           | 7     | 2  | 32,25 |
|           | 8     | 1  | 54,00 |
|           | Total | 60 |       |
| CD163gra6 | 1     | 20 | 28,08 |
|           | 2     | 3  | 33,33 |
|           | 3     | 13 | 34,46 |
|           | 4     | 11 | 21,95 |
|           | 5     | 2  | 46,00 |
|           | 6     | 8  | 34,75 |
|           | 7     | 2  | 26,00 |
|           | 8     | 1  | 57,00 |
|           | Total | 60 |       |
| Hb 1      | 1     | 20 | 27,40 |
|           | 2     | 3  | 23,17 |



|      |       |    |       |
|------|-------|----|-------|
|      | 3     | 13 | 28,77 |
|      | 4     | 11 | 39,14 |
|      | 5     | 2  | 21,50 |
|      | 6     | 8  | 36,19 |
|      | 7     | 2  | 31,75 |
|      | 8     | 1  | 12,00 |
|      | Total | 60 |       |
|      | Hb 2  | 1  | 20    |
| Hb 2 | 2     | 3  | 38,83 |
|      | 3     | 12 | 29,92 |
|      | 4     | 11 | 36,91 |
|      | 5     | 2  | 18,00 |
|      | 6     | 8  | 38,44 |
|      | 7     | 2  | 26,25 |
|      | 8     | 1  | 39,50 |
|      | Total | 59 |       |
| Hb 3 | 1     | 19 | 25,37 |
|      | 2     | 3  | 26,33 |
|      | 3     | 13 | 27,58 |
|      | 4     | 11 | 36,41 |
|      | 5     | 2  | 32,75 |
|      | 6     | 8  | 35,13 |
|      | 7     | 2  | 47,00 |
|      | 8     | 1  | 9,50  |
|      | Total | 59 |       |
| Hb 4 | 1     | 20 | 24,05 |
|      | 2     | 3  | 18,33 |
|      | 3     | 12 | 29,33 |
|      | 4     | 11 | 40,32 |
|      | 5     | 2  | 28,00 |
|      | 6     | 8  | 39,06 |
|      | 7     | 2  | 25,00 |
|      | 8     | 1  | 20,00 |

|       |       |    |       |
|-------|-------|----|-------|
|       | Total | 59 |       |
| Hb 5  | 1     | 20 | 22,03 |
|       | 2     | 3  | 25,00 |
|       | 3     | 13 | 31,04 |
|       | 4     | 11 | 41,64 |
|       | 5     | 2  | 22,75 |
|       | 6     | 8  | 43,19 |
|       | 7     | 2  | 13,00 |
|       | 8     | 1  | 36,00 |
|       | Total | 60 |       |
| Hb 6  | 1     | 20 | 23,85 |
|       | 2     | 3  | 19,83 |
|       | 3     | 13 | 31,96 |
|       | 4     | 11 | 42,86 |
|       | 5     | 2  | 14,50 |
|       | 6     | 8  | 33,94 |
|       | 7     | 2  | 32,50 |
|       | 8     | 1  | 41,00 |
|       | Total | 60 |       |
| PLT 1 | 1     | 20 | 33,70 |
|       | 2     | 3  | 17,17 |
|       | 3     | 13 | 27,27 |
|       | 4     | 11 | 38,14 |
|       | 5     | 2  | 41,75 |
|       | 6     | 8  | 26,31 |
|       | 7     | 2  | 16,75 |
|       | 8     | 1  | 3,00  |
|       | Total | 60 |       |
| PLT 2 | 1     | 20 | 29,90 |
|       | 2     | 3  | 29,00 |
|       | 3     | 11 | 26,59 |
|       | 4     | 11 | 36,73 |
|       | 5     | 2  | 27,50 |

|       |       |    |       |
|-------|-------|----|-------|
|       | 6     | 8  | 25,13 |
|       | 7     | 2  | 28,25 |
|       | 8     | 1  | 17,00 |
|       | Total | 58 |       |
| PLT 3 | 1     | 19 | 30,55 |
|       | 2     | 3  | 24,50 |
|       | 3     | 12 | 22,58 |
|       | 4     | 11 | 41,59 |
|       | 5     | 2  | 43,25 |
|       | 6     | 8  | 24,06 |
|       | 7     | 2  | 22,25 |
|       | 8     | 1  | 5,00  |
|       | Total | 58 |       |
| PLT 4 | 1     | 20 | 26,33 |
|       | 2     | 3  | 24,00 |
|       | 3     | 13 | 22,58 |
|       | 4     | 11 | 47,18 |
|       | 5     | 2  | 39,00 |
|       | 6     | 8  | 35,38 |
|       | 7     | 2  | 27,50 |
|       | 8     | 1  | 3,00  |
|       | Total | 60 |       |
| PLT 5 | 1     | 20 | 26,88 |
|       | 2     | 3  | 25,00 |
|       | 3     | 13 | 20,92 |
|       | 4     | 11 | 47,36 |
|       | 5     | 2  | 46,00 |
|       | 6     | 8  | 33,31 |
|       | 7     | 2  | 24,50 |
|       | 8     | 1  | 17,00 |
|       | Total | 60 |       |
| PLT 6 | 1     | 20 | 24,00 |
|       | 2     | 3  | 18,67 |

|       |    |       |
|-------|----|-------|
| 3     | 12 | 25,00 |
| 4     | 11 | 48,36 |
| 5     | 2  | 41,00 |
| 6     | 8  | 34,06 |
| 7     | 2  | 15,50 |
| 8     | 1  | 16,50 |
| Total | 59 |       |
